# Systematic review of endometriosis pain assessment: how to choose a scale?

Nicolas Bourdel<sup>1,2,\*</sup>, João Alves<sup>1</sup>, Gisele Pickering<sup>3</sup>, Irina Ramilo<sup>1</sup>, Horace Roman<sup>4</sup>, and Michel Canis<sup>1,2</sup>

<sup>1</sup>Department of Gynecologic Surgery, CHU Estaing Clermont Ferrand, 63058 Clermont Ferrand Cedex 1, France <sup>2</sup>Faculté de médecine, ISIT – Université d'Auvergne, Place Henri Dunant, 63000 Clermont-Ferrand, France <sup>3</sup>Centre de Pharmacologie Clinique, CHU Clermont Ferrand, Inserm CIC 501, Inserm, U1107 Neuro-Dol, F-63003 Clermont-Ferrand, France <sup>4</sup>Department of Gynecology and Obstetrics, Rouen University Hospital-Charles Nicolle, 1 rue de Germont, 76031 Rouen, France

\*Correspondence address. E-mail: nicolas.bourdel@gmail.com

Submitted on September 30, 2013; resubmitted on June 21, 2014; accepted on July 10, 2014

## TABLE OF CONTENTS

- Introduction
  - Endometriosis and pain
- Methods
  - Literature search
  - Description and comparison of scales
- Results
  - Pain scales
  - Pain scales
- Discussion
  - Limitations of our study
  - Proposal for an 'Optimal' pain scale in endometriosis
- Conclusion

**BACKGROUND:** Numerous studies concerning endometriosis and pain have been reported. However, there is no consensus on the best method to evaluate pain in endometriosis and many scales have been used. Moreover, there are only a few descriptions of minimal clinically important differences after treatment (MCID) to evaluate variations in pain. In our study, we aim to identify pain scales used in endometriosis pain treatment, to address their strong and weak points and to define which would be the ideal scale to help clinicians and researchers to evaluate endometriosis-related pain.

**METHODS:** A search of the MEDLINE and EMBASE databases was carried out for publications in English, French or Portuguese from 1980 to December 2012, for the words: endometriosis, treatment, pain. Studies were selected if they studied an endometriosis treatment and a pain scale was specified. A quantitative and a qualitative analysis of each scale was performed to define strong and weak points of each scale (systematic registration number: CRD42013005336).

**RESULTS:** A total of 736 publications were identified. After excluding duplications and applying inclusion criteria 258 studies remained. We found that the visual analog scale (VAS) is the most frequently used scale. Both VAS and the numerical rating scale (NRS) show a good balance between strong and weak points in comparison with others such as the Biberoglu and Behrman scale. Concerning MCID, only VAS, NRS and Brief Pain Inventory scales have reported MCID and, among these, only VAS MCID has been studied in endometriosis patients (VAS MCID = 10 mm). Adding the Clinical Global Impression score (CGI) to the pain scale allows calculation of the MCID.

**CONCLUSIONS:** When using pain scales their strengths and weaknesses must be known and included in the analysis. VAS is the most frequently used pain scale and, together with NRS, seems the best adapted for endometriosis pain measurement. The use of VAS or NRS for each type of typical pain related to endometriosis (dysmenorrhea, deep dyspareunia and non-menstrual chronic pelvic pain), combined with the CGI and a quality-of-life scale will provide both clinicians and researchers with tools to evaluate treatment response.

**Key words:** endometriosis / pain / review / scale / responder

## Introduction

### Endometriosis and pain

One of the main symptoms of endometriosis is pain. There are classically three types of pain related to endometriosis: dysmenorrhea, deep dyspareunia and non-menstrual chronic pelvic pain (CPP). Dysmenorrhea is defined as pelvic pain associated with menstrual bleeding, while deep dyspareunia is pelvic pain during deep sexual penetration (Fedele *et al.*, 1992; Stratton and Berkley, 2011): both present with repeated acute pain episodes. CPP has been defined as non-menstrual pelvic pain of >6 months duration that is severe enough to cause functional disability or require medical or surgical treatment (Howard *et al.*, 2000; Howard, 2003). The definition of CPP may be more restrictive and some authors exclude severe dysmenorrhea and deep dyspareunia (Jones and Sutton, 2003), but other experts (Vercellini *et al.*, 1990) recommend a broader definition that includes severe dysmenorrhea, deep dyspareunia and all other painful symptoms located in the pelvis. The difficulty lies not only in the definition of the type of pain related to endometriosis but also in the evaluation of this pain. Pain is a subjective and complex experience, the understanding of which requires a good description of its individual characteristics for each patient (Dworkin *et al.*, 2005). Despite this complexity, many endometriosis studies classify dysmenorrhea, dyspareunia and CPP as either absent, mild, moderate or severe and describe the degree of debility experienced (Biberoglu and Behrman, 1981). This incomplete evaluation strategy hampers assessment of pain outcomes (Vincent *et al.*, 2010) (Stratton and Berkley, 2011). Clinicians are often perplexed when setting up a trial on endometriosis as to how to adequately assess endometriosis-related pain. In order to clarify this point the objectives of this review were first to identify all pain scales described in the literature and used in clinical endometriosis studies, secondly to analyze the main strengths and weaknesses of each scale, and finally, to determine what could constitute an ideal scale.

## Methods

### Literature search

We undertook a MEDLINE and EMBASE search using the following terms: endometriosis treatment; pain. We included observational, retrospective and prospective studies, controlled clinical trials and RCTs; comparative or non-comparative studies, multicenter and single-center studies were all included. Publications were selected if they studied endometriosis treatment and if a pain scale was used. The references of each identified study were also checked for other potentially relevant studies. An additional search was made focusing on every scale and on 'endometriosis' for articles related to scale development applied to endometriosis patients. Studies were limited to those published between January 1980 and December 2012 and written in English, French or Portuguese. Authors were contacted to obtain specific details regarding the pain scales when considered relevant for scale descriptions. Data were collected in Endnote X4<sup>®</sup> independently by two researchers and, at the end, were verified by a third researcher when there was disagreement in the collected data. The search measurement was the sum of articles using each pain scale.

### Description and comparison of scales

We begin by describing all the scales found (quantitative analysis), focusing thereafter on the analysis of their strengths and weaknesses (qualitative analysis: comparative analysis of scales). The strong and weak points were defined according to the literature on chronic pain and specificity of pain in endometriosis. First of all, we focused on criteria used in evaluating potential core outcome measures for chronic pain clinical trials by the IMMPACT group (Initiative on Methods, Measurement and Pain Assessment in Clinical Trials, Dworkin *et al.*, 2005). The mission of IMMPACT (<http://www.immpact.org/>) is to 'develop consensus reviews and recommendations for improving the design, execution, and interpretation of clinical trials of treatments for pain' and members of this group come from academia, regulatory agencies (US Food and Drug Administration (FDA), European Medicines Agency), US National Institutes of Health (NIH), US Veterans Administration, consumer support and advocacy groups and industry. The IMMPACT group has published several guidelines, recommendations and systematic reviews since 2002. The criteria used by IMMPACT were (i) appropriateness of the measure's content and conceptual model, (ii) reliability, (iii) validity, (iv) responsiveness, (v) interpretability, (vi) precision of scores, (vii) respondent and administrator acceptability, (viii) respondent and administrator burden and feasibility, (ix) availability and equivalence of alternate forms and methods of administration (e.g. self-report, interviewer) and (x) availability and equivalence of versions for different cultures and languages. We also included criteria stressed by the Art and Science of Endometriosis meeting (an international meeting convened 5 years ago by the NIH, in collaboration with the American Society for Reproductive Medicine (ASRM), with the aim of establishing entry criteria and outcome measures for use in international clinical trials in endometriosis with regard to pain symptoms): single (summed) or separate pain assessments, cyclicity and frequency of assessment and definition of responder (Vincent *et al.*, 2010). Data regarding pain assessment and scales used in other specialties (Hawker *et al.*, 2011; Hjermstad *et al.*, 2011) were also used when considered relevant for the comparison. We also included the guidance published by the FDA (U.S. Department of Health and Human Services/FDA, 2009) to support claims in approved medical product labeling. This guidance emphasized the use of Patient-reported outcomes (PRO) and PRO instrument in the evaluation of the safety and effectiveness of medical products (such as a treatment for endometriosis or endometriosis-related pain). We then divided the assessment of scales into nine fields to include the criteria previously published by the IMMPACT group, by the Art and Science of Endometriosis meeting, by the FDA and adapted to the specificity of endometriosis: 1, scale description and application; 2, validity, responsiveness, reproducibility and reliability; 3, disease specificity; multidimensionality; 4, respondent and investigator burden and feasibility; 5, validation in foreign languages; 6, precise pain measurement and pain measurement inclusion criteria; 7, timing of pain assessment; 8, PRO and PRO instrument; 9, responder concept and minimal clinically important difference after treatment (MCID).

## Results

We identified 736 articles (flow diagram, Fig. 1) by tracking the key words 'endometriosis', 'treatment' and 'pain'. One hundred and thirty-two duplicates were excluded leaving 604 records to be screened. Abstracts were screened and found that 279 articles did not address the subject of endometriosis treatment response. Disagreement between the two researchers concerned 23 articles (not shown in flow diagram). Sixteen were excluded by the third researcher (articles not within the inclusion criteria: pain scale was not accurately described). After reading

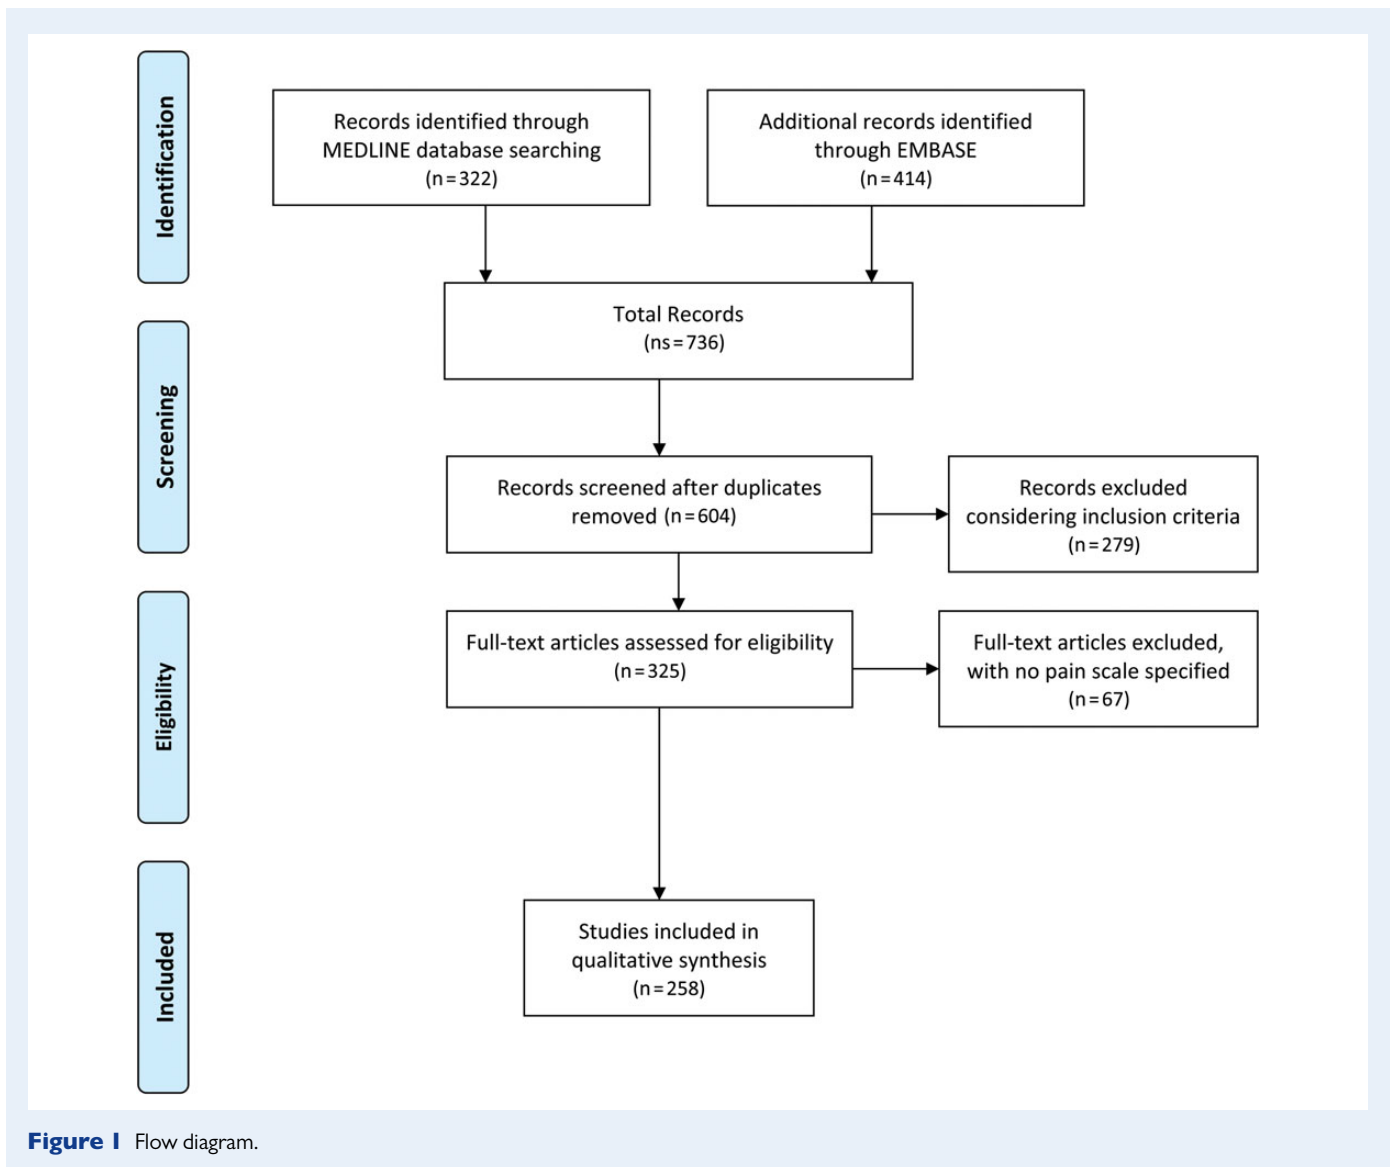

the full records, 67 did not specify the pain scale used and we kept 258 articles for the analysis.

## Pain scales

### Quantitative analysis

In these 258 selected publications, we identified nine scales that are now briefly described. Study references found regarding each scale are presented in Table 1.

**Visual analog scale.** The visual analog scale (VAS) was used most frequently, with a total of 167 publications identified in our search. The VAS consists of a 10 cm long horizontal line with its extremes marked as 'no pain' and 'worst pain imaginable' (Fig. 2). Each patient ticks her pain level on the line and the distance from 'no pain' on the extreme left to the tick mark is measured in millimeters yielding a pain score from 0 to 100 (Gerlinger et al., 2012a, b). This scale can be used for each type of pain, namely dysmenorrhea, dyspareunia, dyschesia and CPP. This self-report of pain is considered as the 'gold standard' of pain measurement.

**Numerical rating scale.** A total of 33 publications were found to have used the Numerical Rating Scale (NRS). The NRS is a segmented numerical version of the VAS in which a respondent selects a whole number (0–10) that best reflects the intensity of the pain (Rodríguez, 2001). The common format is a horizontal bar or line (Fig. 2). Like the VAS pain scale, the NRS is anchored by terms describing pain severity extremes (Breivik et al., 2008; Hawker et al., 2011). This scale can also be used for each type of pain.

**Verbal rating scales.** A total of 48 publications were found to have used Verbal Rating Scales (VRS). VRSs use categories to differentiate pain intensity. There is a wide variability of terms used to describe each category and the rating may be divided into four (0–3) or six (0–5) categories. Patients score their pain intensity from absent (0) to severe (3) or from none (0) to very severe (5) (Vercellini et al., 1999). This scale can also be used for each type of pain.

**Biberoglu and Behrman score.** A total of 48 publications were found to have used the Biberoglu and Behrman (B&B) score. The B&B score (Biberoglu

**Table 1** Studies found in a systematic review of endometriosis pain assessment and the pain scale used.

| Scale                                      | Study references                                                                                                                                                                                                                                                                                                                                                                                                                                                                                                                                                                                                                                                                                                                                                                                                                                                                                                                                                                                                                                                                                                                                                                                                                                                                                                                                                                                                                                                                                                                                                                                                                                                                                                                                                                                                                                                                                                                                                                                                                                                                                                                                                                                                                                                                                                                                                                                                                                                                                                                                                                                                                                                                                                                                                                                                                                                                                                                                                                                                                                                                                                                                                                                                                                                                                                                                                                                                                                                                                                                                                                                                                                                                                                                                                                                                                                                                                                                                                                                                                                                                                                                                                                                                                                                                                                                                                                                                                                                                                                                                                                                                                                                                                                                                                                                                                                                                                                                                                                                                                                                                                                                                                  |
|--------------------------------------------|-------------------------------------------------------------------------------------------------------------------------------------------------------------------------------------------------------------------------------------------------------------------------------------------------------------------------------------------------------------------------------------------------------------------------------------------------------------------------------------------------------------------------------------------------------------------------------------------------------------------------------------------------------------------------------------------------------------------------------------------------------------------------------------------------------------------------------------------------------------------------------------------------------------------------------------------------------------------------------------------------------------------------------------------------------------------------------------------------------------------------------------------------------------------------------------------------------------------------------------------------------------------------------------------------------------------------------------------------------------------------------------------------------------------------------------------------------------------------------------------------------------------------------------------------------------------------------------------------------------------------------------------------------------------------------------------------------------------------------------------------------------------------------------------------------------------------------------------------------------------------------------------------------------------------------------------------------------------------------------------------------------------------------------------------------------------------------------------------------------------------------------------------------------------------------------------------------------------------------------------------------------------------------------------------------------------------------------------------------------------------------------------------------------------------------------------------------------------------------------------------------------------------------------------------------------------------------------------------------------------------------------------------------------------------------------------------------------------------------------------------------------------------------------------------------------------------------------------------------------------------------------------------------------------------------------------------------------------------------------------------------------------------------------------------------------------------------------------------------------------------------------------------------------------------------------------------------------------------------------------------------------------------------------------------------------------------------------------------------------------------------------------------------------------------------------------------------------------------------------------------------------------------------------------------------------------------------------------------------------------------------------------------------------------------------------------------------------------------------------------------------------------------------------------------------------------------------------------------------------------------------------------------------------------------------------------------------------------------------------------------------------------------------------------------------------------------------------------------------------------------------------------------------------------------------------------------------------------------------------------------------------------------------------------------------------------------------------------------------------------------------------------------------------------------------------------------------------------------------------------------------------------------------------------------------------------------------------------------------------------------------------------------------------------------------------------------------------------------------------------------------------------------------------------------------------------------------------------------------------------------------------------------------------------------------------------------------------------------------------------------------------------------------------------------------------------------------------------------------------------------------------------------------------------|
| VAS, <i>n</i> = 167                        | Fedele <i>et al.</i> (1989), Vercellini <i>et al.</i> (1991), Candiani <i>et al.</i> (1992), Fedele <i>et al.</i> (1992), Vercellini <i>et al.</i> (1993), Fedele <i>et al.</i> (1993), Parazzini <i>et al.</i> (1994), Sutton <i>et al.</i> (1994), Vercellini <i>et al.</i> (1994), Gestrinone Italian Study Group (1996), Kettel <i>et al.</i> (1996), Vercellini <i>et al.</i> (1996a), Crosignani <i>et al.</i> (1996b), Sutton <i>et al.</i> (1997), Beretta <i>et al.</i> (1998), Kettel <i>et al.</i> (1998), Bergqvist <i>et al.</i> (1998), Takeuchi <i>et al.</i> (1999), Bianchi <i>et al.</i> (1999), Morgante <i>et al.</i> (1999), Fedele <i>et al.</i> (1999), Vercellini <i>et al.</i> (1999), Parazzini <i>et al.</i> (2000), Garry <i>et al.</i> (2000), Muzii <i>et al.</i> (2000), Miller (2000), Fedele <i>et al.</i> (2001), Jones <i>et al.</i> (2001), Chapron <i>et al.</i> (2001), Kaminski <i>et al.</i> (2001), Gordon <i>et al.</i> (2002), Vercellini <i>et al.</i> (2002), Ylanen <i>et al.</i> (2003), Zullo <i>et al.</i> (2003), Vercellini <i>et al.</i> (2003a), Ylanen <i>et al.</i> (2003), Milingos <i>et al.</i> (2003), Abbott <i>et al.</i> (2003), Vercellini <i>et al.</i> (2003c), Abbott <i>et al.</i> (2004), Ailawadi <i>et al.</i> (2004), Alborzi <i>et al.</i> (2004), Cobellis <i>et al.</i> (2004a), Cobellis <i>et al.</i> (2004b), Ford <i>et al.</i> (2004), Johnson <i>et al.</i> (2004), Abbott <i>et al.</i> (2004), Zupi <i>et al.</i> (2004), Fedele <i>et al.</i> (2004), Huber <i>et al.</i> (2004), Zullo <i>et al.</i> (2004), Amsterdam <i>et al.</i> (2005), Laursen <i>et al.</i> (2005), Petta <i>et al.</i> (2005), Lockhat <i>et al.</i> (2005), Petta <i>et al.</i> (2005), Vignali <i>et al.</i> (2005), Hong (2005), Ikeda <i>et al.</i> (2005), Vercellini <i>et al.</i> (2005), Heffler <i>et al.</i> (2005), Lyons <i>et al.</i> (2006), Vercellini <i>et al.</i> (2006), Parker <i>et al.</i> (2006), Wykes <i>et al.</i> (2006), Parazzini <i>et al.</i> (2006), Ceyhan <i>et al.</i> (2006), Gomes <i>et al.</i> (2007), Razzi <i>et al.</i> (2007), Alborzi <i>et al.</i> (2007), Sesti <i>et al.</i> (2007), Acien <i>et al.</i> (2007), Remorgida <i>et al.</i> (2007a, b), Remorgida <i>et al.</i> (2007a, b), Frenna <i>et al.</i> (2007), Villa <i>et al.</i> (2007), Seracchioli <i>et al.</i> (2007), Razzi <i>et al.</i> (2007), Kristensen and Kjer (2007), Ferrero <i>et al.</i> (2007), Fedele <i>et al.</i> (2007), Landi <i>et al.</i> (2008), Stratton <i>et al.</i> (2008), Harada <i>et al.</i> (2008), Roman <i>et al.</i> (2008), Koninckx <i>et al.</i> (2008), Manwaring <i>et al.</i> (2008), Kamencic and Thiel (2008), Kitawaki <i>et al.</i> (2008), Seracchioli <i>et al.</i> (2008), Daniels <i>et al.</i> (2009), Kaiser <i>et al.</i> (2009), Ferrero <i>et al.</i> (2009), Harada <i>et al.</i> (2009), Momoeda <i>et al.</i> (2009), Jedrzejczak <i>et al.</i> (2009), Lijoi <i>et al.</i> (2009), Walch <i>et al.</i> (2009), Romão <i>et al.</i> (2009), Walch <i>et al.</i> (2009), Stepniewska <i>et al.</i> (2009), Harada <i>et al.</i> (2009), Ferreira <i>et al.</i> (2010), Vercellini <i>et al.</i> (2010), Gerlinger <i>et al.</i> (2010), Ferreira <i>et al.</i> (2010), Porpora <i>et al.</i> (2010), Long <i>et al.</i> (2010), Lv <i>et al.</i> (2010), Roman <i>et al.</i> (2010a, b), Strowitzki <i>et al.</i> (2010b), Rubi-Klein <i>et al.</i> (2010), Darai <i>et al.</i> (2010a), Healey <i>et al.</i> (2010), Roman <i>et al.</i> (2010), Seracchioli <i>et al.</i> (2010a), Seracchioli <i>et al.</i> (2010b), Strowitzki <i>et al.</i> (2010a), Valiani <i>et al.</i> (2010), Minelli <i>et al.</i> (2010), He <i>et al.</i> (2010), Ferrero <i>et al.</i> (2010a, b, c), Mereu <i>et al.</i> (2010), Cobellis <i>et al.</i> (2011), Souza <i>et al.</i> (2011), Hsu <i>et al.</i> (2011), Karp <i>et al.</i> (2011), Kitawaki <i>et al.</i> (2011), Possover <i>et al.</i> (2011), Gerlinger and Schmelter (2011), Xu <i>et al.</i> (2011), Tandoi <i>et al.</i> (2011), Stepniewska <i>et al.</i> (2010), Missmer and Bove (2011), Ferrero <i>et al.</i> (2011), Mabrouk <i>et al.</i> (2011), Coccia <i>et al.</i> (2011), Alborzi <i>et al.</i> (2011), Shi <i>et al.</i> (2011), Abushahin <i>et al.</i> (2011), Flower <i>et al.</i> (2011), Ferrero <i>et al.</i> (2011), Muzii <i>et al.</i> (2011), Bayoglu Tekin <i>et al.</i> (2011), Petraglia <i>et al.</i> (2012), Cheewadhanaraks <i>et al.</i> (2012), Vercellini <i>et al.</i> (2012), Mabrouk <i>et al.</i> (2012), Ghahiri <i>et al.</i> (2012), Gerlinger <i>et al.</i> (2012b), Martellucci <i>et al.</i> (2012), Setala <i>et al.</i> (2012), Tanmahasamut <i>et al.</i> (2012), Strowitzki <i>et al.</i> (2012), Mereu <i>et al.</i> (2012), Napadow <i>et al.</i> (2012), Santanam <i>et al.</i> (2013), Gerlinger <i>et al.</i> (2012a), Mabrouk <i>et al.</i> (2012), Wickstrom <i>et al.</i> (2012), McKinnon <i>et al.</i> (2012), Friggi Sebe Petrelluzzi <i>et al.</i> (2012), Ferrari <i>et al.</i> (2012), Dubuisson <i>et al.</i> (2013) |
| Numeric rating scale, <i>n</i> = 33        | Fedele <i>et al.</i> (1989), Candiani <i>et al.</i> (1992), Busacca <i>et al.</i> (1998), Ling (1999), Morgante <i>et al.</i> (1999), Hurst <i>et al.</i> (2000), Busacca <i>et al.</i> (2001), Fauconier <i>et al.</i> (2002), Chapron <i>et al.</i> (2003), Thomassin <i>et al.</i> (2004), Chopin <i>et al.</i> (2005), Darai <i>et al.</i> (2005), Dubernard <i>et al.</i> (2006), Fedele <i>et al.</i> (2006), Landi <i>et al.</i> (2006), Fedele <i>et al.</i> (2007), Wayne <i>et al.</i> (2008), Wayne <i>et al.</i> (2008), Ahn <i>et al.</i> (2009), Doyle <i>et al.</i> (2009), Minelli <i>et al.</i> (2009), Minelli <i>et al.</i> (2009), Darai <i>et al.</i> (2010b), Deal <i>et al.</i> (2010), Roghaei <i>et al.</i> (2010), Kovoor <i>et al.</i> (2010), Chawla (2010), Guzik <i>et al.</i> (2011), Bassi <i>et al.</i> (2011), Miranda-Mendoza <i>et al.</i> (2012), Ercoli <i>et al.</i> (2012), Kaser <i>et al.</i> (2012), Issa <i>et al.</i> (2012)                                                                                                                                                                                                                                                                                                                                                                                                                                                                                                                                                                                                                                                                                                                                                                                                                                                                                                                                                                                                                                                                                                                                                                                                                                                                                                                                                                                                                                                                                                                                                                                                                                                                                                                                                                                                                                                                                                                                                                                                                                                                                                                                                                                                                                                                                                                                                                                                                                                                                                                                                                                                                                                                                                                                                                                                                                                                                                                                                                                                                                                                                                                                                                                                                                                                                                                                                                                                                                                                                                                                                                                                                                                                                                                                                                                                                                                                                                                                                                                                                                                                                                                                                                                         |
| Verbal rating scale, <i>n</i> = 48         | Kaupilla and Ronnberg (1985), Shaw (1990), Schlaff <i>et al.</i> (1990), Elstein <i>et al.</i> (1992), Rock <i>et al.</i> (1993), Vercellini <i>et al.</i> (1991), Vercellini <i>et al.</i> (1993), Vercellini <i>et al.</i> (1994), Biggerstaff Iii and Foster (1994), Redwine (1994), Carpenter <i>et al.</i> (1995), Gestrinone Italian Study Group (1996), Vercellini <i>et al.</i> (1996), Crosignani <i>et al.</i> (1996a, b), Vercellini <i>et al.</i> (1996), Dmowski <i>et al.</i> (1997), Tummon <i>et al.</i> (1989), Regidor <i>et al.</i> (1997), Bergqvist <i>et al.</i> (1998), Vercellini <i>et al.</i> (1998), Dmowski <i>et al.</i> (1989), Vercellini <i>et al.</i> (1999a, b), Ling (1999), Bianchi <i>et al.</i> (1999), Harrison and Barry-Kinsella (2000), Fedele <i>et al.</i> (2000), Kwok <i>et al.</i> (2001), Bulletti <i>et al.</i> (2001), Vercellini <i>et al.</i> (2003c), Abrao <i>et al.</i> (2003), Wong and Tang (2004), Lockhat <i>et al.</i> (2005), Wright <i>et al.</i> (2005), Nardo <i>et al.</i> (2005), Hill <i>et al.</i> (2005), Trivedi <i>et al.</i> (2007), Harada <i>et al.</i> (2008), Stratton <i>et al.</i> (2008), Wang <i>et al.</i> (2009), Harada <i>et al.</i> (2009), Momoeda <i>et al.</i> (2009), Radosa <i>et al.</i> (2010), Kim <i>et al.</i> (2011), Yeung <i>et al.</i> (2011), Wurm <i>et al.</i> (2011), Cheewadhanaraks <i>et al.</i> (2012), Dubuisson <i>et al.</i> (2013)                                                                                                                                                                                                                                                                                                                                                                                                                                                                                                                                                                                                                                                                                                                                                                                                                                                                                                                                                                                                                                                                                                                                                                                                                                                                                                                                                                                                                                                                                                                                                                                                                                                                                                                                                                                                                                                                                                                                                                                                                                                                                                                                                                                                                                                                                                                                                                                                                                                                                                                                                                                                                                                                                                                                                                                                                                                                                                                                                                                                                                                                                                                                                                                                                                                                                                                                                                                                                                                                                                                                                                                                                                                                                                                 |
| Biberoglu and Behrman scale, <i>n</i> = 48 | Mettler <i>et al.</i> (1991), Candiani <i>et al.</i> (1992), Wheeler <i>et al.</i> (1992), Reichel <i>et al.</i> (1992), Cirkel <i>et al.</i> (1995), Cirkel <i>et al.</i> (1995), Choktanasiri <i>et al.</i> (1996), Vercellini <i>et al.</i> (1996b), Hornstein <i>et al.</i> (1997a), Hornstein <i>et al.</i> (1997b), Gregoriou <i>et al.</i> (1997), Colwell <i>et al.</i> (1998), Hornstein <i>et al.</i> (1998), Ling (1999), Vercellini <i>et al.</i> (1999a, b), Bergqvist and Group (2000), Fedele <i>et al.</i> (2000), Miller (2000), Bergqvist and Theorell (2001), Busacca <i>et al.</i> (2001), Fedele <i>et al.</i> (2001), Surrey and Hornstein (2002), Vercellini <i>et al.</i> (2002), Vercellini <i>et al.</i> (2003b), Vercellini <i>et al.</i> (2003a), Soysal <i>et al.</i> (2003), Soysal <i>et al.</i> (2004), Fernandez <i>et al.</i> (2004), Cheng <i>et al.</i> (2005), Vercellini <i>et al.</i> (2005), Cheng <i>et al.</i> (2005), Crosignani <i>et al.</i> (2006), Angioni <i>et al.</i> (2006), Vercellini <i>et al.</i> (2006), Schlaff <i>et al.</i> (2006), Crosignani <i>et al.</i> (2006), Wayne <i>et al.</i> (2008), Loverro <i>et al.</i> (2008), Moravek <i>et al.</i> (2009), Vercellini <i>et al.</i> (2010), Deal <i>et al.</i> (2010), Lv <i>et al.</i> (2010), Ferrero <i>et al.</i> (2011), Guzik <i>et al.</i> (2011), Bayoglu Tekin <i>et al.</i> (2011), Strowitzki <i>et al.</i> (2012), Gerlinger <i>et al.</i> (2012b), Maia <i>et al.</i> (2012)                                                                                                                                                                                                                                                                                                                                                                                                                                                                                                                                                                                                                                                                                                                                                                                                                                                                                                                                                                                                                                                                                                                                                                                                                                                                                                                                                                                                                                                                                                                                                                                                                                                                                                                                                                                                                                                                                                                                                                                                                                                                                                                                                                                                                                                                                                                                                                                                                                                                                                                                                                                                                                                                                                                                                                                                                                                                                                                                                                                                                                                                                                                                                                                                                                                                                                                                                                                                                                                                                                                                                                                                                                                            |
| McGill Pain Questionnaire, <i>n</i> = 8    | Ling (1999), Gordon <i>et al.</i> (2002), Lukanova and Popov (2008), Moravek <i>et al.</i> (2009), Fabbri <i>et al.</i> (2009), Valiani <i>et al.</i> (2010), Xiang <i>et al.</i> (2011), Martin <i>et al.</i> (2011)                                                                                                                                                                                                                                                                                                                                                                                                                                                                                                                                                                                                                                                                                                                                                                                                                                                                                                                                                                                                                                                                                                                                                                                                                                                                                                                                                                                                                                                                                                                                                                                                                                                                                                                                                                                                                                                                                                                                                                                                                                                                                                                                                                                                                                                                                                                                                                                                                                                                                                                                                                                                                                                                                                                                                                                                                                                                                                                                                                                                                                                                                                                                                                                                                                                                                                                                                                                                                                                                                                                                                                                                                                                                                                                                                                                                                                                                                                                                                                                                                                                                                                                                                                                                                                                                                                                                                                                                                                                                                                                                                                                                                                                                                                                                                                                                                                                                                                                                             |
| Andresch and Milsom's scale, <i>n</i> = 7  | Fedele <i>et al.</i> (1989), Candiani <i>et al.</i> (1992), Fedele <i>et al.</i> (1992), Parazzini <i>et al.</i> (1994), Parazzini <i>et al.</i> (2000), Parazzini <i>et al.</i> (2001), Gruppo Italiano per la studio dell'Endometriosi (2001), Parazzini <i>et al.</i> (2006)                                                                                                                                                                                                                                                                                                                                                                                                                                                                                                                                                                                                                                                                                                                                                                                                                                                                                                                                                                                                                                                                                                                                                                                                                                                                                                                                                                                                                                                                                                                                                                                                                                                                                                                                                                                                                                                                                                                                                                                                                                                                                                                                                                                                                                                                                                                                                                                                                                                                                                                                                                                                                                                                                                                                                                                                                                                                                                                                                                                                                                                                                                                                                                                                                                                                                                                                                                                                                                                                                                                                                                                                                                                                                                                                                                                                                                                                                                                                                                                                                                                                                                                                                                                                                                                                                                                                                                                                                                                                                                                                                                                                                                                                                                                                                                                                                                                                                   |

Continued

**Table I** Continued

| Scale                                           | Study references     |
|-------------------------------------------------|----------------------|
| Detailed questionnaire of dysmenorrhea, $n = 1$ | Tjaden et al. (1990) |
| Endometriosis pain and bleeding diary, $n = 1$  | Deal et al. (2010)   |
| Brief Pain Inventory scale, $n = 1$             | Deal et al. (2010)   |

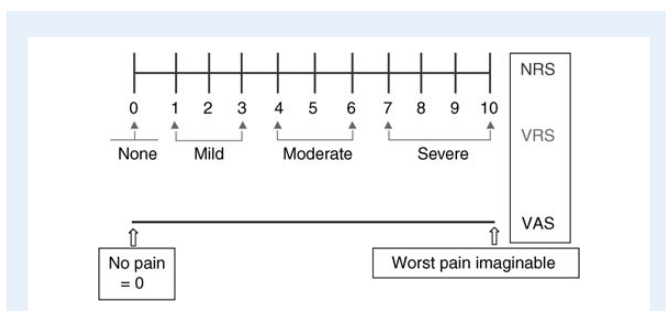

**Figure 2** VAS, NRS (numeric rating scale) and VRS (verbal rating scale). From Breivik et al. (2008). Used by permission of Oxford University Press.

and Behrman, 1981) consists of a rating based on the patient's assessment of three distinct pain symptoms (dysmenorrhea, pelvic pain and dyspareunia) and on two findings obtained during gynecologic palpation (tenderness and induration). Each symptom is classified as absent, mild, moderate or severe. The original article only described a severity profile for symptoms and findings (for example severe dysmenorrhea is considered to be when the patient remains in bed for one or more days). Modified versions of the B&B score combine the three pain symptoms into the 'pelvic symptoms score' or 'endometriosis symptom severity scale' and the two clinical findings into the 'physical symptoms score'. This can be misleading because if the comparison is made between a woman with moderate dyspareunia, dysmenorrhea and pelvic pain and a consequent score of 6, and another woman with severe dyspareunia (avoids intercourse because of pain) but mild dysmenorrhea and no pelvic pain and a score of only 4, the incapacitating symptomatology is not taken into account. Finally, both the pelvic symptoms score and the physical symptoms score can be combined with the 'B&B total sum score' (Gerlinger et al., 2012a, b). The final score ranges from 0 to 15 (Fig. 3). This final score can also be confusing and potentially hazardous because combining physical examination with symptomatology can induce wrong conclusions. Patients describe symptomatology and gynecologists evaluate tenderness and induration during physical examination with an exceedingly high risk of bias and inconsistent reproducibility.

**McGill Pain Questionnaire.** A total of eight publications were found to have used the McGill Pain Questionnaire (MPQ). The MPQ is a multidimensional verbal scale in which descriptive terms play a role to help women in defining their own pain (Fabbri et al., 2009; Hawker et al., 2011). It has five dimensions: pain location, intensity, quality, pattern, alleviating and aggravating factors. Pain intensity is measured in six

categories as in the VRS (0 = none, 1 = mild, 2 = discomforting, 3 = distressing, 4 = horrible and 5 = excruciating). Pain location is assessed on a sketch of the human body where the patient draws the areas that are painful. The number of pain sites is summed as an indicator of the sensory pain dimension. Pain quality is assessed by asking the patient 'what does your pain feel like?' with selection from 78 descriptors in 20 subclasses. In relation to the pain pattern (sensory dimension), participants respond to the question 'How does your pain change with time?' by selecting from nine words (continuous, steady, constant, rhythmic, periodic, intermittent, brief, momentary and transient). These nine words are categorized into three main pain patterns—continuous, intermittent and transient. Finally, in relation to alleviating and aggravating factors (behavioral dimension), participants respond to two open-ended questions: 'What kind of things decrease your pain?' and 'What kind of things increase your pain?' Responses are qualitative and commonly are organized in themes with frequency distributions reported. The pain score is a sum of all applicable descriptors with a maximum of 78 and a minimum of 0. This scale is frequently used for chronic pain assessment.

**Andersch and Milsom scale.** A total of seven publications were found to have used the Andersch and Milsom scale. The Andersch and Milsom scale defines pain severity according to work performance (unaffected = 0; rarely affected = 1; moderately affected = 2 and clearly inhibited = 3), the coexistence of systematic symptoms (absent = 0 and present = 1) and the consumption of analgesics (never = 0; rarely = 1; regularly = 2 and never because they are ineffective = 3) (Andersch and Milsom, 1982). The total score is a sum of every answer and, therefore, the maximum score is 7 and the minimum 0.

**Detailed questionnaire of dysmenorrhea (Tjaden et al., 1990).** One publication was found using this scale. This is described by the author as a detailed questionnaire in the subjective assessment of dysmenorrhea before surgery and 6 months after surgery. This questionnaire includes a section on personal history as well as a list of 80 descriptive terms frequently noted by patients with dysmenorrhea. Patients are asked to choose all terms that are applicable. An anatomical diagram for location of dysmenorrhea is also included (Tjaden et al., 1990). The author does not, however, specify the method to calculate the pain score or the range of this pain scale.

**Endometriosis pain and bleeding diary.** One publication was found using this scale. It is a 17-item diary (assessing for instance dyspareunia) concerning endometriosis pain and allowing correlation with the bleeding pattern. It measures pain with a NRS (0–10) namely: intermittent pelvic pain, continuous pelvic pain, intermittent dysmenorrhea, continuous dysmenorrhea and dyspareunia (Deal et al., 2010).

|                                                                    |                                                                                |                                                 |
|--------------------------------------------------------------------|--------------------------------------------------------------------------------|-------------------------------------------------|
| <b>A. Pelvic pain</b>                                              |                                                                                |                                                 |
| None                                                               | 0                                                                              |                                                 |
| Mild                                                               | 1 = Occasional pelvic discomfort                                               |                                                 |
| Moderate                                                           | 2 = Noticeable discomfort for most of the cycle                                |                                                 |
| Severe                                                             | 3 = Requires strong analgesics. Persist during cycle when not menstruating     |                                                 |
| <b>B. Dysmenorrhea</b>                                             |                                                                                |                                                 |
| None                                                               | 0                                                                              |                                                 |
| Mild                                                               | 1 = Some loss in work efficiency                                               |                                                 |
| Moderate                                                           | 2 = In bed part of the day, occasional loss of work efficiency                 |                                                 |
| Severe                                                             | 3 = In bed one or more days incapacitation                                     |                                                 |
| <b>C. Dyspareunia</b>                                              |                                                                                | <b>Total Pelvic Pain Score ( A + B + C )</b>    |
| None                                                               | 0                                                                              | None 0                                          |
| Mild                                                               | 1 = Tolerated discomfort                                                       | Mild 1 – 3                                      |
| Moderate                                                           | 2 = Intercourse painful to the point of causing interdiction                   | Moderate 4 – 6                                  |
| Severe                                                             | 3 = Avoids intercourse because of pain                                         | Severe 7 – 9                                    |
| <b>D. Pelvic tenderness</b>                                        |                                                                                |                                                 |
| None                                                               | 0                                                                              |                                                 |
| Mild                                                               | 1 = Minimal tenderness on palpation                                            |                                                 |
| Moderate                                                           | 2 = Extensive tenderness on palpation                                          |                                                 |
| Severe                                                             | 3 = Unable to palpate because of tenderness                                    |                                                 |
| <b>E. induration</b>                                               |                                                                                | <b>Total Physical Sign Pain Score ( D + E )</b> |
| None                                                               | 0                                                                              | None 0                                          |
| Mild                                                               | 1 = Uterus freely mobile, induration in the cul-de-sac                         | Mild 1 – 2                                      |
| Moderate                                                           | 2 = Thickened and indurated adnexa and cul-de-sac, restricted uterine mobility | Moderate 3 – 4                                  |
| Severe                                                             | 3 = Nodular adnexa and cul-de-sac, uterus frequently frozen                    | Severe 5 – 6                                    |
| <b>Total Symptom and Sign Severity score ( A + B + C + D + E )</b> |                                                                                |                                                 |
| None                                                               | 0                                                                              |                                                 |
| Mild                                                               | 1 – 2                                                                          |                                                 |
| Moderate                                                           | 3 – 5                                                                          |                                                 |
| Severe                                                             | 6 – 10                                                                         |                                                 |
| Very severe                                                        | 11 – 15                                                                        |                                                 |

**Figure 3** B&B score. From [Biberoglu and Behrman \(1981\)](#). Used by permission of Elsevier.

*The modified Brief Pain Inventory—short form.* One publication has been reported. A modified version of the Brief Pain Inventory—short form (mBPI-SF) ([Cleeland, 1991](#)) was used in only one study ([Deal et al., 2010](#)). The BPI-SF measures pain intensity, the impact of pain on daily functions, pain location and analgesic use. In the mBPI-SF, pain location and analgesic use items were excluded. Thus, the mBPI-SF uses a 0–10 NRS to rate pain intensity (four items), pain relief (one item) and level of pain interference (seven items) from the patient's perspective. In this study, the four severity items were averaged to assess pain intensity. The seven items relating to pain interference were averaged to provide an overall interference. The pain score ranges from 0 to 1.

## Pain scales

### Qualitative analysis: comparative analysis of scales

Qualitative analysis was performed as described in 'Methods'. The principal characteristics (classified as weak/strong points) of the nine pain scales are summarized in [Table II](#).

*Scale description and application.* All are accurately described except the detailed questionnaire of dysmenorrhea used in a single study ([Tjaden et al., 1990](#)). VAS is the most frequently used pain scale in endometriosis treatment and 167 articles using this scale were found ([Table II](#)), followed by VRS and B&B, which were each used in 48 articles. Despite the fact that most scales are well described, some of these scales, such as B&B and VRS, have been administered in different formats by authors (only partially or with restrictions), thus making a comparative analysis more difficult ([Vincent et al., 2010](#)). For instance, VRS has different numbers of categories described with the most common being four categories. Concerning B&B, some authors applied B&B as first described and others excluded the pelvic examination (part of the initially described scale). So almost all scales are precisely described but some, such as B&B and VRS, were applied using modified versions. Although scales such as VAS and NRS do not have many modified versions available (in the studies included) the existence of these modified versions using different extremity descriptors ([Hjermstad et al., 2011](#)) underlines the importance of applying scales in a uniform manner.

**Table II** Characteristics of each pain scale and their strong and weak points.

|                                               | VAS scale | Numerical rating scale (0–10) | Verbal rating scale (categories) | B&B score | McGill Pain Questionnaire | Andresch and Milsom's scale | Detailed questionnaire of dysmenorrhea | Endometriosis pain and bleeding diary | Modified Brief Pain inventory-short form |
|-----------------------------------------------|-----------|-------------------------------|----------------------------------|-----------|---------------------------|-----------------------------|----------------------------------------|---------------------------------------|------------------------------------------|
| Number of studies identified using each scale | 167       | 33                            | 48                               | 48        | 8                         | 7                           | 1                                      | 1                                     | 1                                        |
| Strong points                                 |           |                               |                                  |           |                           |                             |                                        |                                       |                                          |
| Accurately described                          | *         | *                             | *                                | *         | *                         | *                           |                                        | *                                     | *                                        |
| Identically administered                      | *         | *                             |                                  |           | *                         |                             |                                        | *                                     | *                                        |
| With minimal score inclusion criteria         | *         | *                             | *                                |           |                           |                             |                                        |                                       |                                          |
| Specific to endometriosis                     |           |                               |                                  | *         |                           |                             | *                                      | *                                     |                                          |
| Easy to administer                            | *         | *                             | *                                |           |                           |                             |                                        | *                                     |                                          |
| Was it validated?                             | *         | *                             |                                  |           | *                         |                             |                                        | *                                     | *                                        |
| Able to detect a response to treatment        | *         | *                             |                                  |           | *                         |                             |                                        | *                                     | *                                        |
| Reliability                                   | *         | *                             |                                  |           | *                         |                             |                                        | *                                     | *                                        |
| Multidimensional                              |           |                               |                                  | *         | *                         | *                           | *                                      | *                                     | *                                        |
| Comply with patient-reported outcome          |           |                               |                                  |           |                           |                             |                                        | *                                     |                                          |
| Appropriate for low literacy patients         | *         | *                             | *                                | *         |                           |                             |                                        |                                       |                                          |
| Daily assessment feasible                     | *         | *                             | *                                |           | *                         |                             |                                        | *                                     |                                          |
| Weak points                                   |           |                               |                                  |           |                           |                             |                                        |                                       |                                          |
| Limited response categories                   | *         | *                             | *                                | *         | *                         | *                           | *                                      | *                                     | *                                        |
| Subjective pain measure                       | *         | *                             | *                                | *         | *                         | *                           | *                                      | *                                     | *                                        |
| Patient non-compliance to answer scale        |           |                               |                                  |           |                           |                             |                                        |                                       | *                                        |
| Only health professional can administer scale |           |                               |                                  | *         | *                         | *                           |                                        |                                       |                                          |
| Only validated in English                     |           |                               |                                  | *         |                           | *                           | *                                      | *                                     |                                          |

*Validity, responsiveness, reproducibility and reliability.* To validate a questionnaire it is necessary to compare it with other validated scales in a population and to perform a confirmatory factor analysis, to analyze the internal consistency and reliability, its construct validity, discriminant validity and its responsiveness. It is important that pain scales are adequately validated, reproducible and reliable. Among the nine scales of this review, three scales (Andresch and Milsom, detailed questionnaire of dysmenorrhea, B&B) have not been validated and have not been through reproducibility and reliability studies. However, B&B was specially designed for endometriosis. All studies, except the detailed questionnaire of dysmenorrhea, were responsive and could detect a change in pain score after endometriosis treatment (Wheeler *et al.*, 1992; Vercellini *et al.*, 1993; Gestrinone Italian Study Group, 1996; Hornstein *et al.*, 1997a; Ling, 1999; Deal *et al.*, 2010).

*Disease specificity, multidimensionality.* The only scales specific to endometriosis are B&B, detailed questionnaire of dysmenorrhea and the Endometriosis Pain and Bleeding Diary. They address specific issues of this disease, such as pelvic examination (Biberoglu and Behrman, 1981) or bleeding pattern (Deal *et al.*, 2010), that other scales do not take in consideration. Apart from VAS, NRS and VRS that only evaluate the intensity of pain, the other scales are multidimensional and assess other domains than pain. VAS and NRS scales are considered to be the most sensitive scales in chronic pain trials (Dworkin *et al.*, 2005) because NRS is an 11-point scale and VAS is a 100-mm point instrument. VAS and NRS, however, assess only pain intensity and the BPI-SF is recommended when physical functioning is to be assessed, as in the IMMPACT recommendations for core outcome measures (Dworkin *et al.*, 2005), because when assessing chronic pain it seems important to establish its consequences on physical functioning.

*Respondent and investigator burden and feasibility.* NRS and VRS are easier to administer, with better patient compliance (and are more suitable for low literacy), but are less detailed, showing less precision in pain scores (Hjermstad *et al.*, 2011). In a systematic review including 54 studies on different types of pain comparing VAS, NRS and VRS, Hjermstad *et al.* (2011) found that VRS is the scale that patients tend to find easier to fill out, therefore, limiting missed data as described by other authors (Dworkin *et al.*, 2005). With respect to the question of investigator burden, in almost all studies the pain scale is applied by doctors or other health staff but VRS, NRS, Endometriosis Pain and Bleeding Diary and the BPI-SF can be self-administered with the advantages of avoiding rater bias and being less time consuming for investigators. The Endometriosis Pain and Bleeding Diary can also be filled out electronically, easing data collection. In a recent study of 1643 veterans comparing self-pain survey with NRS in electronic medical records, Goulet *et al.* (2013) found that the electronic medical records could underestimate pain scores, underlining the importance of pain score self-administration because it is more accurate. In summary, VRS appears to be the easier scale for patients to fill out with optimal self-assessment. Concerning investigator burden, simpler scales, such as VRS and NRS, are easy and quick to administer. Similarly, pain scales with electronic self-administration, such as the Endometriosis Pain and Bleeding Diary, are not time consuming. In contrast, the MPQ with 78 descriptors and a multidimensional assessment is more difficult to manage.

*Validation in foreign languages.* With respect to scale availability in languages other than English, the B&B, Andresch and Milsom's scale, the Detailed Questionnaire of Dysmenorrhea and the Electronic Pain and Bleeding Diary only have an English-speaking version; therefore, limiting their worldwide availability and easy comparison between studies performed in different countries. All other scales are widely used, translated and validated in several languages.

*Precise pain measurement and pain measurement inclusion criteria.* All pain scales have limited response categories but the VAS scale seems to be the strongest (Hjermstad *et al.*, 2011) because it uses a continuous scale (0–100 mm) and, because the question is generic and patients probably include in their answer pain-related information other than pain intensity. Moreover, a pain scale measure is always subjective. 'Worst pain possible' varies from person to person and even a 2-point decrease on an NRS may not be equivalent in different individuals (Farrar *et al.*, 2001): for example, women who have had vaginal childbirth (possibly considered the worst pain possible) compared with other nulliparous women who have different criteria for 'worst pain possible'. In relation to pain measure inclusion criteria, some of these scales can have inclusion criteria such as the VAS and NRS, excluding patients in the lower categories of pain (i.e. VAS < 5 as in Vercellini *et al.* (2002)), meaning that there is a minimum level of pain required for enrollment in the studies. Usually only patients with moderate pain (VAS > 5) are enrolled in studies (Vercellini *et al.*, 2002), but these values have not been justified and are derived from expert/consensual guidelines. A scale-like B&B has no inclusion criteria, thus limiting its use. In conclusion, the most precise pain scale seems to be the VAS scale, being a continuous (0–100 mm) scale.

*Timing of pain assessment.* If a pain scale is simple and easy to use, such as VAS, NRS and VRS, daily pain assessment is quite feasible. All scales studied except B&B and the detailed questionnaire of dysmenorrhea can be used daily. Separate pain assessments for dysmenorrhea and pelvic pain are superior to a single pain measurement, principally because many treatments induce amenorrhea. Daily pain and the amount of vaginal bleeding should be recorded for at least one calendar month before treatment in order to obtain adequate baseline measurements because of chronological fluctuations (Nnoaham *et al.*, 2011). The use of a daily diary to record both pain scores and bleeding could provide additional support for this approach (Vincent *et al.*, 2010), as recommended in FDA guidelines (U.S. Department of Health and Human Services FDA, 2009). When the treatment is finished, data should be collected when possible (ideally daily), spacing out the timing, with however no consensus so far about when to do so (Vincent *et al.*, 2010). Most of the studies assess pain once before the treatment and at least two or three times after the treatment (6 months and 1 year after the treatment).

*PRO and PRO instrument.* A PRO is considered to be 'any report of the status of a patient's health condition that comes directly from the patient, without interpretation of the patient's response by the clinician or anyone else', as mentioned in the 2009 FDA PRO Guidance for industry. A PRO instrument (or measure) is a tool for measuring function or feeling (reported by patients in a clinical trial) to evaluate the benefits of treatment. The FDA guidance document describes in detail the development of a PRO instrument (conceptual framework of a PRO



instrument, end-point model and content validity). PRO instruments allow identification of items most important to patients, increase accuracy of measuring outcomes and allow more frequent assessments. Since the Endometriosis Pain and Bleeding Diary (Deal et al., 2010) is a recently developed scale, it has been described in only one study that encompasses the electronic diary description, this being part of PRO according to FDA guidelines (U.S. Department of Health and Human Services FDA, 2009). To our knowledge, this remains the sole instrument available according to the new FDA recommendations, but has been described in a single study only, thus limiting assessment of its applicability.

**Responder concept and MCID.** A patient is a responder when there is a score change in a measure, experienced by this individual patient over a predetermined time period that has been demonstrated in the target population to have a significant treatment benefit (U.S. Department of Health and Human Services FDA, 2009). In other words, an individual is considered as a responder when there is the smallest score change in a measure, experienced individually, that has been considered in the population to have a significant treatment benefit. Vincent et al. (2010) suggested that the definition of responder in endometriosis is either a >30 or >50% reduction in symptoms (but the precise definition will depend on the trial) and that a clear definition of a responder should be provided in each trial. We found no studies in the literature (concerning endometriosis) using these criteria of responder. This is a simplified manner for distinguishing between responder and non-responder. The concept of MCID allows a more precise and probably more valuable method to distinguish responder from non-responder. MCID after treatment is considered to be 'the smallest difference in score in the domain of interest that patients perceive as important, either beneficial or harmful, and that would lead the clinician to consider a change in the patient's management' (Guyatt et al., 2002). In fact even the terminology 'MCID' itself can be confusing, with several terms differing only slightly in definition (e.g. MCID, clinically important difference, minimally detectable difference, the subjectively significant difference. . .) (King, 2011). There are two main methods to determine MCID: the 'anchor-based' (relating changes in scores on a measure to a standard that is different from the specific measure itself) and the 'distribution-based' methods (using statistical parameters associated with the measure to interpret the magnitude of changes in the measure's scores over time) (Revicki et al., 2006; Dworkin et al., 2008). MCID has been described in endometriosis only for VAS, NRS and BPI. For VAS, Gerlinger et al. (2010) combined the VAS and the improvement score of the Clinical Global Impression (CGI) rating scales. This 7-point score classified how much the patient's illness has improved or worsened, rated as 1, very much improved; 2, much improved; 3, minimally improved; 4, no change; 5, minimally worse; 6, much worse or 7, very much worse. Gerlinger et al. (2010) determined 10 mm as the MCID in endometriosis (using data extracted from two RCTs and including 281 patients (Gerlinger et al., 2010)). In relation to the other two scales described in Table II, NRS and BPI-SF, they do not have MCID described for patients with endometriosis but they are widely used and their MCID is described in other pathologies.

## Discussion

Endometriosis pain should be considered in the context of chronic pain in general and evaluated accordingly (Tracey and Bushnell, 2009; Stratton

and Berkley, 2011). Pelvic pain can have different causes and it may be difficult to relate pain to endometriosis. When endometriosis is believed to be the cause of pain, the treatment may be with analgesics, hormonal therapies and/or surgery. Nonetheless, pain often recurs, and it is not necessarily associated with recurrence of lesions (Stratton and Berkley, 2011). There is a growing interest in moving the endometriosis treatment focus from pathological classification improvement (like the ASRM classification) to PRO. Moreover, there is no perfect relation between the lesion (number, size and infiltration) and pain (Stratton and Berkley, 2011). An optimal evaluation of pain, of its evolution and the response to pain treatment are therefore mandatory. Despite the fact that endometriosis is a specific disease with a well-defined pain presentation, there are only few specific pain scales available such as the B&B scale (Biberoglu and Behrman, 1981) and the Endometriosis Pain and Bleeding Diary (Deal et al., 2010) but these are not widely accepted (Table II).

Very few articles compared different pain scales in patients with endometriosis as Gerlinger et al. (2012b) did. They compared VAS, B&B and SF-36 Bodily Pain Subscale with the CGI score on 428 patients extracted from three studies (Gerlinger et al., 2012b). The highest correlation with the CGI score was observed for the VAS followed by the B&B pelvic pain item. These correlations are probably arguments to use simplified tools such as VAS or NRS and they concluded that a general measure of endometriosis-related pain could be recommended as a primary end-point in clinical trials to assess painful symptoms of endometriosis. That was also the conclusion of the Art and Science of Endometriosis meeting which concluded that the primary outcome measures should include daily ratings of pelvic pain, of dysmenorrhea, daily record of bleeding and ratings on an 11-point NRS. The specific recommendations for using NRS are probably extracted from the IMMPACT group recommendations. However, there are stronger data specific to endometriosis concerning VAS compared with NRS. Regarding the timing of assessment, only VAS or NRS allow a frequent (i.e. daily or weekly) evaluation of pain. Moreover, as we showed in the results the most precise pain evaluation seems to be the VAS scale. VRS seems to be too approximate to evaluate precisely pain and even more change in pain. VAS also allows simplified inclusion criteria (VAS > 50 mm) to be defined for patients in studies, thus increasing homogeneity within and between studies. VAS or NRS is also easily used both by practitioners and patients, are available in many languages, and no copyright nor authorization are needed to use them. VAS and NRS also allow the three main types of pain to be measured as the evaluation of pain in general (as reported in many studies (Gerlinger et al., 2010)) seems to be insufficient (Vincent et al., 2010).

Moreover, in a review selecting pain scales to measure chronic pain, Dworkin et al. (2005) considered some of the most important criteria to evaluate scales, namely their validity, reproducibility and reliability in a consensus of pain experts' views. VAS and NRS perfectly fit these criteria. More research is probably needed to render the Andresch and Milsom's scale, the detailed questionnaire of dysmenorrhea and the B&B scale more valuable in terms of validity, reproducibility and reliability. Or these scales could be simply abandoned as evaluation using other scales has been demonstrated to be simple, reproducible and reliable, while measuring the same outcomes. During the Art and Science of Endometriosis meeting the question of continuing to use the B&B scale was put to the panel of invited scientists and clinicians from the UK, USA and Italy. The B&B scale was rejected as a primary end-point. As a secondary end-point many publications and recommendations insist on the evaluation of quality of life (QOL) (Dworkin et al., 2008; Gerlinger

*et al.*, 2010; Vincent *et al.*, 2010). The Endometriosis Health Profile-30 (EHP-30) questionnaire allows measurement of physical and emotional functioning and its use has been recommended but the SF-36 (even though not disease specific) also allows this measurement (Dworkin *et al.*, 2008; Gerlinger *et al.*, 2010; Vincent *et al.*, 2010). Vincent *et al.* recommended the use of B&B and EHP-30 as secondary end-points which seems, from our point of view, very time consuming and probably confusing for the patient compared with the use of one type of scale. In our review, there is no strong argument for the benefit of B&B.

The main problem remains the concept of Responder and MCID. The value of MCID is specific to the population included in the study and varies within different diseases. Nonetheless, this value is important because researchers and clinicians should always weigh very carefully the possible complications of any therapeutic plan against the minimal important difference. MCID has been described for medical treatment but finally there is no specific description for surgical treatment. Many evaluations of chronic pain in general do not involve surgical treatment, as endometriosis does (Farrar *et al.*, 2001). A 10 mm difference on a 100 mm VAS constitutes a clinically meaningful difference when the treatment alternatives being compared have similar baseline safety and cost profiles. This is an important point, as we cannot assume that MCID values found in other diseases and treatments are applicable to patients with endometriosis. More studies using anchor tools such as the CGI Score are needed in order to study MCID specifically related to patients with endometriosis (Dworkin *et al.*, 2008). Even after calculating MCID, it is important to recognize that all points on pain scales may not be equal. For example, the results of a study of labor epidural analgesia (Beilin *et al.*, 2003) suggested that, at least in some circumstances, a change in pain intensity from 3 to 1 on a 0–10 NRS may be of greater importance than a change from 6 to 4. In addition, it is not only the MCID that is important but also the larger improvements. Specifically, VAS reductions of > 30% reflect at least moderately clinically (as defined by the IMMPACT group) important differences and reductions > 50% appear to reflect substantial improvements, but these values have never been studied in patients with endometriosis. It is recommended that the percentages of patients responding with these degrees of improvement be reported as the number of pain-free patients after treatment (Dworkin *et al.*, 2008).

In fact, we probably have to separate daily practice from inclusion in clinical studies. In clinical studies the concept of primary end-point and secondary end-point should be respected with the use of VAS or NRS for each type of the three pains while adding the CGI (to calculate the rate of responder) and the use of one QOL scale. This will provide both clinicians and researchers with tools to evaluate treatment response and not only considering the statistically significant difference between treatment groups (Dworkin *et al.*, 2008). In daily practice the use of VAS or NRS for each type of pain could be sufficient for initial evaluation of our patient, while adding CGI for evaluation of the treatments and follow-up. Evaluation of the satisfaction is probably the key point in the evaluation of treatment of endometriosis-related pain, and classification with the CGI improvement scale seems a simple and reproducible tool for PRO.

## Limitations of our study

Endometriosis is a complex disease and pain is an important component of the syndrome but not the only one (Setala *et al.*, 2012). QOL is also of importance from the patient's point of view (Nnoaham *et al.*, 2011). In

this context, scales that only assess pain intensity in relation to endometriosis are always incomplete with respect to the general view of endometriosis as a disease. In this review, we deliberately did not include evaluation of QOL scale or other characteristics related to endometriosis in order to focus on pain, but data on QOL would have been valuable to add. However, we included a pain scale that also evaluates QOL and we tried in our discussion to respect the need to evaluate QOL when completing the evaluation of pain. We included in this review clinical trials, comparative studies, controlled clinical trials, RCTs and multicenter studies and excluded all other articles published about endometriosis treatment that assess pain. Consequently, we may have not analyzed other relevant scales published in various articles. Some authors were contacted in order to give specific details of their scales but not all replied, hence limiting our analysis. This review followed a methodology similar to the one used in other domains such as pain specialists (Hjermstad *et al.*, 2011) for example, but with a search limited by the restricted field of endometriosis. We did not evaluate the influence of loss of follow-up in the measurement of pain: however, any effort aimed at defining the best modality to measure pain symptoms in women with endometriosis and comparing treatment alternatives would be pointless if only efficacy analyses are conducted, thus excluding losses to follow-up for any reason. Only intention-to-treat analyses must be conducted, as this is one of the main methodological aspects that may result in reliable assessment of the effect of different therapeutic options.

## Proposal for an 'Optimal' pain scale in endometriosis

Pain is a complex and subjective domain and no optimal pain scale for endometriosis evaluation and treatment is yet available. We propose (Table III) an ideal pain scale in patients with endometriosis showing some points that could be added, such as Internet use (Deal *et al.*, 2010) or the possibility to add specific symptoms such as dyschezia. The main problem after analyzing the literature is, do we need an ideal pain scale? VAS and NRS scales seem to be the two scales with a better balance between strong and weak points (Table II): they both are valid, reliable, precise, translated into the most frequently spoken languages, easy to administer and fulfill. Nonetheless, NRS is easier to fulfill

**Table III Optimal pain scale in endometriosis.**

### Optimal pain scale in endometriosis

|                                                                                               |
|-----------------------------------------------------------------------------------------------|
| Takes account of endometriosis pain specificities (such as menstrual pattern, dyspareunia)    |
| Is adequately described, uniformly administered, validated and reliable                       |
| Is easy to administer and score/not time consuming                                            |
| Can be self-administered                                                                      |
| Has the concept of responder feasible/MCID (Minimal Clinically Important Difference) included |
| Is appropriate to low literacy patients                                                       |
| Has worldwide translation                                                                     |
| Access comorbidities (such as dyschezia) should be captured                                   |
| Has a 'not applicable' box (for symptoms such as dyspareunia)                                 |
| Captures analgesia and complementary treatments                                               |
| Has the possibility of daily pain assessment                                                  |

and administer in comparison with VAS and clinical experts recommend using NRS instead of VAS, which can be expected to provide similar results (Gerlinger et al., 2012b). On the other hand, the B&B scale has several biases and does not appear to fulfill the requirements for state-of-the-art PRO tools as its items were developed on the basis of expert opinion rather than patient input. In addition, the B&B scale has a potential recall bias (4-week period), is inaccurately inflated concerning amenorrhoea or sexually inactivity and is subject to rater bias (Vincent et al., 2010). Concerning the VAS and NRS scales, patients interpret measurement scales very differently and can vary widely when reporting pain and baseline scores. In order to compensate for this variability, measures of improvement usually adjust to the individual's baseline measure by calculating raw change or percentage change. Even so, without additional data it is difficult to evaluate the clinical importance of a numeric change, such as a 1- or 2-point decrease on a 0–10-point scale. The concept of responder may be of great help in this context and this concept is feasible for both VAS and NRS. When designing chronic pain clinical trials, the IMMPACT group has recommended six core outcome domains (Turk et al., 2003): (i) pain; (ii) physical functioning; (iii) emotional functioning; (iv) participant ratings of improvement and satisfaction with treatment; (v) other symptoms and adverse events and (vi) participant disposition and characteristics data (Turk et al., 2003). By using VAS or NRS for the three main types of endometriotic pain (CPP, dysmenorrhoea and dyspareunia), the CGI to calculate rate of responder or MCID, SF36 or EHP30 and the report of other symptoms (important for the patient), the guidelines of IMMPACT, the Art and Science of Endometriosis meeting and the FDA PRO guidelines are finally almost all respected. For everyday evaluation, adding CGI to VAS or NRS (for the three types of pain) seems feasible, quick and reproducible.

## Conclusion

In conclusion, studies should not only analyze statistically for a significant difference but also complete their analyses with: the MCID for the population studied; the proportion of patients that had at least the MCID; the more important improvements and those that did not improve or got worse. Ideally studies should measure pain at least for one calendar month before treatment and then at 3, 6 and 12 months thereafter, continuing their annual evaluation as long as possible. Despite these suggestions, it is often difficult to have optimal conditions in the ward to evaluate patients and to use new tools, such as the Endometriosis Pain and Bleeding Diary, which enables an assessment of pain without an excessive burden for the clinical staff. The VAS scale is the most commonly used scale in endometriosis studies with an MCID determined at 10 mm. This MCID should be related to the specific characteristics of the treatment being studied, and this difference should not be < 10 mm, but it could be greater in case of considerable differences between medical interventions in terms of safety, tolerability or costs. Both VAS and NRS combined with CGI show a better balance between strong and weak points compared with other scales.

## Authors' roles

N.B. and M.C.: design of the study, A.J., N.B. and I.R.: review of the literature and drafting of the manuscript, G.P., H.R. and M.C.: review and correction of the manuscript.

## Funding

No funding was received.

## Conflict of interest

The author(s) report no financial or other conflict of interest relevant to the subject of this article.

## References

- Abbott JA, Hawe J, Clayton RD, Garry R. The effects and effectiveness of laparoscopic excision of endometriosis: a prospective study with 2–5 year follow-up. *Hum Reprod* 2003;**18**:1922–1927.
- Abbott J, Hawe J, Hunter D, Holmes M, Finn P, Garry R. Laparoscopic excision of endometriosis: a randomized, placebo-controlled trial. *Fertil Steril* 2004;**82**:878–884.
- Abrao MS, Neme RM, Carvalho FM, Aldrighi JM, Pinotti JA. Histological classification of endometriosis as a predictor of response to treatment. *Int J Gynaecol Obstet* 2003;**82**:31–40.
- Abushahin F, Goldman KN, Barbieri E, Milad M, Rademaker A, Bulun SE. Aromatase inhibition for refractory endometriosis-related chronic pelvic pain. *Fertil Steril* 2011;**96**:939–942.
- Acién P, Velasco I, Gutierrez M, Martínez-Beltrán M. Aromatase expression in endometriotic tissues and its relationship to clinical and analytical findings. *Fertil Steril* 2007;**88**:32–38.
- Ahn AC, Schnyer R, Conboy L, Laufer MR, Wayne PM. Electrodermal measures of Jing-Well points and their clinical relevance in endometriosis-related chronic pelvic pain. *J Altern Complement Med* 2009;**15**:1293–1305.
- Ailawadi RK, Jobanputra S, Kataria M, Gurates B, Bulun SE. Treatment of endometriosis and chronic pelvic pain with letrozole and norethindrone acetate: a pilot study. *Fertil Steril* 2004;**81**:290–296.
- Alborzi S, Momtahan M, Parsanezhad ME, Dehbashi S, Zolghadri J. A prospective, randomized study comparing laparoscopic ovarian cystectomy versus fenestration and coagulation in patients with endometriomas. *Fertil Steril* 2004;**82**:1633–1637.
- Alborzi S, Ghotbi S, Parsanezhad ME, Dehbashi S, Alborzi M. Pentoxifylline therapy after laparoscopic surgery for different stages of endometriosis: a prospective, double-blind, randomized, placebo-controlled study. *J Minim Invasive Gynecol* 2007;**14**:54–58.
- Alborzi S, Hamed B, Omidvar A, Dehbashi S, Alborzi S, Alborzi M. A comparison of the effect of short-term aromatase inhibitor (letrozole) and GnRH agonist (triptorelin) versus case control on pregnancy rate and symptom and sign recurrence after laparoscopic treatment of endometriosis. *Arch Gynecol Obstet* 2011;**284**:105–110.
- Amsterdam LL, Gentry W, Jobanputra S, Wolf M, Rubin SD, Bulun SE. Anastrozole and oral contraceptives: a novel treatment for endometriosis. *Fertil Steril* 2005;**84**:300–304.
- Andersch B, Milsom I. An epidemiologic study of young women with dysmenorrhoea. *Am J Obstet Gynecol* 1982;**144**:655–660.
- Angioni S, Peiretti M, Zirone M, Palomba M, Mais V, Gornelli V, Melis GB. Laparoscopic excision of posterior vaginal fornix in the treatment of patients with deep endometriosis without rectum involvement: surgical treatment and long-term follow-up. *Hum Reprod* 2006;**21**:1629–1634.
- Barcelos PR, Conde DM, Deus JM, Martinez EZ. Quality of life of women with chronic pelvic pain: a cross-sectional analytical study. *Rev Bras Ginecol Obstet* 2010;**32**:247–253.
- Bassi MA, Podgaec S, Dias JA Jr, D'Amico Filho N, Petta CA, Abrao MS. Quality of life after segmental resection of the rectosigmoid by laparoscopy in patients with deep infiltrating endometriosis with bowel involvement. *J Minim Invasive Gynecol* 2011;**18**:730–733.
- Bayoglu Tekin Y, Dilbaz B, Altinbas SK, Dilbaz S. Postoperative medical treatment of chronic pelvic pain related to severe endometriosis: levonorgestrel-releasing intrauterine system versus gonadotropin-releasing hormone analogue. *Fertil Steril* 2011;**95**:492–496.
- Beilin Y, Hossain S, Bodian CA. The numeric rating scale and labor epidural analgesia. *Anesth Analg* 2003;**96**:1794–1798.

- Beretta P, Franchi M, Ghezzi F, Busacca M, Zupi E, Bolis P. Randomized clinical trial of two laparoscopic treatments of endometriomas: cystectomy versus drainage and coagulation. *Fertil Steril* 1998;**70**:1176–1180.
- Bergqvist A, Group S. A comparative study of the acceptability and effect of goserelin and nafarelin on endometriosis. *Gynecol Endocrinol* 2000;**14**:425–432.
- Bergqvist A, Theorell T. Changes in quality of life after hormonal treatment of endometriosis. *Acta Obstet Gynecol Scand* 2001;**80**:628–637.
- Bergqvist A, Bergh T, Hogstrom L, Mattsson S, Nordenskjold F, Rasmussen C. Effects of triptorelin versus placebo on the symptoms of endometriosis. *Fertil Steril* 1998;**69**:702–708.
- Bianchi S, Busacca M, Agnoli B, Candiani M, Calia C, Vignali M. Effects of 3 month therapy with danazol after laparoscopic surgery for stage III/IV endometriosis: a randomized study. *Hum Reprod* 1999;**14**:1335–1337.
- Biberoglu KO, Behrman SJ. Dosage aspects of danazol therapy in endometriosis: short-term and long-term effectiveness. *Am J Obstet Gynecol* 1981;**139**:645–654.
- Biggerstaff ED III, Foster SN. Laparoscopic presacral neurectomy for treatment of midline pelvic pain. *J Am Assoc Gynecol Laparosc* 1994;**2**:31–35.
- Breivik H, Borchgrevink PC, Allen SM, Rosseland LA, Romundstad L, Hals EK, Kvarstein G, Stubhaug A. Assessment of pain. *Br J Anaesth* 2008;**101**:17–24.
- Bullette C, DeZiegler D, Stefanetti M, Cicinelli E, Pelosi E, Flamigni C. Endometriosis: absence of recurrence in patients after endometrial ablation. *Hum Reprod* 2001;**16**:2676–2679.
- Busacca M, Fedele L, Bianchi S, Candiani M, Agnoli B, Raffaelli R, Vignali M. Surgical treatment of recurrent endometriosis: laparotomy versus laparoscopy. *Hum Reprod* 1998;**13**:2271–2274.
- Busacca M, Somigliana E, Bianchi S, De Marinis S, Calia C, Candiani M, Vignali M. Post-operative GnRH analogue treatment after conservative surgery for symptomatic endometriosis stage III-IV: a randomized controlled trial. *Hum Reprod* 2001;**16**:2399–2402.
- Candiani GB, Fedele L, Vercellini P, Bianchi S, Di Nola G. Presacral neurectomy for the treatment of pelvic pain associated with endometriosis: a controlled study. *Am J Obstet Gynecol* 1992;**167**:100–103.
- Carpenter SE, Tjaden B, Rock JA, Kimball A. The effect of regular exercise on women receiving danazol for treatment of endometriosis. *Int J Gynaecol Obstet* 1995;**49**:299–304.
- Ceyhan T, Atay V, Gungor S, Karateke A, Oral O, Baser I. Efficacy of laparoscopically-assisted extracorporeal cystectomy in patients with ovarian endometrioma. *J Minim Invasive Gynecol* 2006;**13**:145–149.
- Chapron C, Jacob S, Dubuisson JB, Vieira M, Liaras E, Fauconnier A. Laparoscopically assisted vaginal management of deep endometriosis infiltrating the rectovaginal septum. *Acta Obstet Gynecol Scand* 2001;**80**:349–354.
- Chapron C, Fauconnier A, Dubuisson JB, Barakat H, Vieira M, Bréart G. Deep infiltrating endometriosis: relation between severity of dysmenorrhoea and extent of disease. *Hum Reprod* 2003;**18**:760–766.
- Chawla S. Treatment of endometriosis and chronic pelvic pain with letrozole and norethindrone acetate. *MJAFI* 2010, **66**:213–215.
- Cheewadhanaraks S, Choksuchat C, Dhanaworavibul K, Liabsuetrakul T. Postoperative depot medroxyprogesterone acetate versus continuous oral contraceptive pills in the treatment of endometriosis-associated pain: a randomized comparative trial. *Gynecol Obstet Invest* 2012;**74**:151–156.
- Cheng MH, Yu BK, Chang SP, Wang PH. A randomized, parallel, comparative study of the efficacy and safety of nafarelin versus danazol in the treatment of endometriosis in Taiwan. *J Chin Med Assoc* 2005;**68**:307–314.
- Choktanasiri W, Boonkasemsanti W, Sittisomwong T, Kunathikom S, Suksompong S, Udomsubpayakul U, Rojanasakul A. Long-acting triptorelin for the treatment of endometriosis. *Int J Gynaecol Obstet* 1996;**54**:237–243.
- Chopin N, Vieira M, Borghese B, Foulot H, Dousset B, Coste J, Mignon A, Fauconnier A, Chapron C. Operative management of deeply infiltrating endometriosis: results on pelvic pain symptoms according to a surgical classification. *J Minim Invasive Gynecol* 2005;**12**:106–112.
- Cirkel U, Ochs H, Schneider HP. A randomized, comparative trial of triptorelin depot (D-Trp6-LHRH) and danazol in the treatment of endometriosis. *Eur J Obstet Gynecol Reprod Biol* 1995;**59**:61–69.
- Cleeland CS. Brief Pain Inventory—Short Form© Copyright 1991 Charles S. Cleeland, PhD, Pain Research Group; Interactive Performance Technologies, LLC—All rights reserved, 1991.
- Cobellis L, Razzi S, De Simone S, Sartini A, Fava A, Danero S, Gioffre W, Mazzini M, Petraglia F. The treatment with a COX-2 specific inhibitor is effective in the management of pain related to endometriosis. *Eur J Obstet Gynecol Reprod Biol* 2004a;**116**:100–102.
- Cobellis L, Razzi S, Fava A, Severi FM, Igarashi M, Petraglia F. A danazol-loaded intrauterine device decreases dysmenorrhea, pelvic pain, and dyspareunia associated with endometriosis. *Fertil Steril* 2004b;**82**:239–240.
- Cobellis L, Castaldi MA, Giordano V, Trabucco E, De Franciscis P, Torella M, Colacurci N. Effectiveness of the association micronized N-Palmitoylethanolamine (PEA)-transpolydatin in the treatment of chronic pelvic pain related to endometriosis after laparoscopic assessment: a pilot study. *Eur J Obstet Gynecol Reprod Biol* 2011;**158**:82–86.
- Coccia ME, Rizzello F, Palagiano A, Scarselli G. Long-term follow-up after laparoscopic treatment for endometriosis: multivariate analysis of predictive factors for recurrence of endometriotic lesions and pain. *Eur J Obstet Gynecol Reprod Biol* 2011;**157**:78–83.
- Colwell HH, Mathias SD, Pasta DJ, Henning JM, Steege JF. A health-related quality-of-life instrument for symptomatic patients with endometriosis: a validation study. *Am J Obstet Gynecol* 1998;**179**:47–55.
- Crosignani PG, De Cecco L, Gastaldi A, Venturini PL, Oldani S, Vegetti W, Semino A, La Commare P, Vercellini P. Leuprolide in a 3-monthly versus a monthly depot formulation for the treatment of symptomatic endometriosis: a pilot study. *Hum Reprod* 1996a;**11**:2732–2735.
- Crosignani PG, Vercellini P, Biffignandi F, Costantini W, Cortesi I, Imperato E. Laparoscopy versus laparotomy in conservative surgical treatment for severe endometriosis. *Fertil Steril* 1996b;**66**:706–711.
- Crosignani PG, Luciano A, Ray A, Bergqvist A. Subcutaneous depot medroxyprogesterone acetate versus leuprolide acetate in the treatment of endometriosis-associated pain. *Hum Reprod* 2006;**21**:248–256.
- Daniels J, Gray R, Hills RK, Latthe P, Buckley L, Gupta J, Selman T, Adey E, Xiong T, Champaneria R, et al. LUNA Trial Collaboration. Laparoscopic uterosacral nerve ablation for alleviating chronic pelvic pain: a randomized controlled trial. *JAMA* 2009;**302**:955–961.
- Darai E, Thomassin I, Barranger E, Detchev R, Cortez A, Houry S, Bazot M. Feasibility and clinical outcome of laparoscopic colorectal resection for endometriosis. *Am J Obstet Gynecol* 2005;**192**:394–400.
- Darai E, Ballester M, Chereau E, Coutant C, Rouzier R, Wafo E. Laparoscopic versus laparotomic radical en bloc hysterectomy and colorectal resection for endometriosis. *Surg Endosc* 2010a;**24**:3060–3067.
- Darai E, Dubernard G, Coutant C, Frey C, Rouzier R, Ballester M. Randomized trial of laparoscopically assisted versus open colorectal resection for endometriosis: morbidity, symptoms, quality of life, and fertility. *Ann Surg* 2010b;**251**:1018–1023.
- Deal LS, DiBenedetti D, Williams VSL, Fehnel SE. The development and validation of the daily electronic Endometriosis Pain and Bleeding Diary. *Health Qual Life Outcomes* 2010;**8**:64.
- Dmowski WP, Gleicher N. Does endometriosis have an adverse effect on the fertilization in vitro and the IVF outcome? *J Assist Reprod Genet* 1998;**15**:527–529.
- Dmowski WP, Radwanska E, Binor Z, Tummon I, Pepping P. Ovarian suppression induced with Buserelin or danazol in the management of endometriosis: a randomized, comparative study. *Fertil Steril* 1989;**51**:395–400.
- Dmowski WP, Rana N, Pepping P, Cain DF, Clay TH. Excretion of urinary N-telopeptides reflects changes in bone turnover during ovarian suppression and indicates individually variable estradiol threshold for bone loss. *Fertil Steril* 1996;**66**:929–936.
- Dmowski WP, Lesniewicz R, Rana N, Pepping P, Noursalehi M. Changing trends in the diagnosis of endometriosis: a comparative study of women with pelvic endometriosis presenting with chronic pelvic pain or infertility. *Fertil Steril* 1997;**67**:238–243.
- Doyle JO, Missmer SA, Laufer MR. The effect of combined surgical-medical intervention on the progression of endometriosis in an adolescent and young adult population. *J Pediatr Adolesc Gynecol* 2009;**22**:257–263.
- Dubernard G, Picketty M, Rouzier R, Houry S, Bazot M, Darai E. Quality of life after laparoscopic colorectal resection for endometriosis. *Hum Reprod* 2006;**21**:1243–1247.
- Dubuisson J, Pont M, Roy P, Golfier F, Raudrant D. Female sexuality after surgical treatment of symptomatic deep pelvic endometriosis. *Gynecol Obstet Fertil* 2013;**41**:38–44.
- Dworkin RH, Turk DC, Farrar JT, Haythornthwaite JA, Jensen MP, Katz NP, Kerns RD, Stucki G, Allen RR, Bellamy N et al. Core outcome measures for chronic pain clinical trials: IMMPACT recommendations. *Pain* 2005;**113**:9–19.

- Dworkin RH, Turk DC, Wyrwich KW, Beaton D, Cleeland CS, Farrar JT, Haythornthwaite JA, Jensen MP, Kerns RD, Ader DN et al. Interpreting the clinical importance of treatment outcomes in chronic pain clinical trials: IMMPACT Recommendations. *J Pain* 2008;**9**:105–121.
- Elstein M, Bancroft K, Rolland R, Van der Heijden T, Barlow D, Kennedy S, Shaw R, Williams I, Bergquist C, Claesson B et al. The Nafarelin European Endometriosis Group. A large scale danazol controlled trial of efficacy and safety with one year follow-up. *Fertil Steril* 1992;**57**:514–522.
- Ercoli A, D'asta M, Fagotti A, Fanfani F, Romano F, Baldazzi G, Salerno MG, Scambia G. Robotic treatment of colorectal endometriosis: technique, feasibility and short-term results. *Hum Reprod* 2012;**27**:722–726.
- Fabbri E, Villa G, Mabrouk M, Guerrini M, Montanari G, Paradisi R, Venturoli S, Seracchioli R. McGill Pain Questionnaire: a multi-dimensional verbal scale assessing postoperative changes in pain symptoms associated with severe endometriosis. *J Obstet Gynaecol Res* 2009;**35**:753–760.
- Farrar JT, Young JP Jr, LaMoreaux L, Werth JL, Poole RM. Clinical importance of changes in chronic pain intensity measured on an 11-point numerical pain rating scale. *Pain* 2001;**94**:149–158.
- Fauconnier A, Chapron C, Dubuisson JB, Vieira M, Dousset B, Breart G. Relation between pain symptoms and the anatomic location of deep infiltrating endometriosis. *Fertil Steril* 2002;**78**:719–726.
- Fedele L, Arcaini L, Bianchi S, Baglioni A, Vercellini P. Comparison of cyproterone acetate and danazol in the treatment of pelvic pain associated with endometriosis. *Obstet Gynecol* 1989;**73**:1000–1004.
- Fedele L, Bianchi S, Boccione L, Di Nola G, Parazzini F. Pain symptoms associated with endometriosis. *Obstet Gynecol* 1992;**79**:767–769.
- Fedele L, Bianchi S, Boccione L, Di Nola G, Franchi D. Buserelin acetate in the treatment of pelvic pain associated with minimal and mild endometriosis: a controlled study. *Fertil Steril* 1993;**59**:516–521.
- Fedele L, Bianchi S, Raffaelli R, Zanconato G. Comparison of transdermal estradiol and tibolone for the treatment of oophorectomized women with deep residual endometriosis. *Maturitas* 1999;**32**:189–193.
- Fedele L, Bianchi S, Zanconato G, Tozzi L, Raffaelli R. Gonadotropin-releasing hormone agonist treatment for endometriosis of the rectovaginal septum. *Am J Obstet Gynecol* 2000;**183**:1462–1467.
- Fedele L, Bianchi S, Zanconato G, Portuese A, Raffaelli R. Use of a levonorgestrel-releasing intrauterine device in the treatment of rectovaginal endometriosis. *Fertil Steril* 2001;**75**:485–488.
- Fedele L, Bianchi S, Zanconato G, Bettoni G, Gotsch F. Long-term follow-up after conservative surgery for rectovaginal endometriosis. *Am J Obstet Gynecol* 2004;**190**:1020–1024.
- Fedele L, Bianchi S, Zanconato G, Berlanda N, Raffaelli R, Fontana E. Laparoscopic excision of recurrent endometriomas: long-term outcome and comparison with primary surgery. *Fertil Steril* 2006;**85**:694–699.
- Fedele L, Bianchi S, Carmignani L, Berlanda N, Fontana E, Frontino G. Evaluation of a new questionnaire for the presurgical diagnosis of bladder endometriosis. *Hum Reprod* 2007;**22**:2698–2701.
- Fernandez H, Lucas C, Hédon B, Meyer JL, Mayenga JM, Roux C. One year comparison between two add-back therapies in patients treated with a GnRH agonist for symptomatic endometriosis: a randomized double-blind trial. *Hum Reprod* 2004;**19**:1465–1471.
- Ferreira RA, Vieira CS, Rosa ESJC, Rosa-e-Silva AC, Nogueira AA, Ferriani RA. Effects of the levonorgestrel-releasing intrauterine system on cardiovascular risk markers in patients with endometriosis: a comparative study with the GnRH analogue. *Contraception* 2010;**81**:117–122.
- Ferrero S, Abbamonte LH, Giordano M, Ragni N, Remorgida V. Deep dyspareunia and sex life after laparoscopic excision of endometriosis. *Hum Reprod* 2007;**22**:1142–1148.
- Ferrero S, Camerini G, Seracchioli R, Ragni N, Venturini PL, Remorgida V. Letrozole combined with norethisterone acetate compared with norethisterone acetate alone in the treatment of pain symptoms caused by endometriosis. *Hum Reprod* 2009;**24**:3033–3041.
- Ferrero S, Camerini G, Ragni N, Venturini PL, Biscaldi E, Seracchioli R, Remorgida V. Letrozole and norethisterone acetate in colorectal endometriosis. *Eur J Obstet Gynecol Reprod Biol* 2010a;**150**:199–202.
- Ferrero S, Arena E, Morando A, Remorgida V. Prevalence of newly diagnosed endometriosis in women attending the general practitioner. *Int J Gynaecol Obstet* 2010b;**110**:203–207.
- Ferrero S, Camerini G, Ragni N, Menada MV, Venturini PL, Remorgida V. Triptorelin improves intestinal symptoms among patients with colorectal endometriosis. *Int J Gynaecol Obstet* 2010c;**108**:250–251.
- Ferrero S, Venturini PL, Gillott DJ, Remorgida V. Letrozole and norethisterone acetate versus letrozole and triptorelin in the treatment of endometriosis related pain symptoms: a randomized controlled trial. *Reprod Biol Endocrinol* 2011;**9**:88.
- Flower A, Lewith GT, Little P. A feasibility study exploring the role of Chinese herbal medicine in the treatment of endometriosis. *J Altern Complement Med* 2011;**17**:691–699.
- Ferrari S, Persico P, Di Puppo F, Vigano P, Tandoi I, Garavaglia E, Giardina P, Mezzi G, Candiani M. Continuous low-dose oral contraceptive in the treatment of colorectal endometriosis evaluated by rectal endoscopic ultrasonography. *Acta Obstet Gynecol Scand* 2012;**91**:699–703.
- Ford J, English J, Miles WA, Giannopoulos T. Pain, quality of life and complications following the radical resection of rectovaginal endometriosis. *BJOG* 2004;**111**:353–356.
- Frenna V, Santos L, Ohana E, Bailey C, Wattiez A. Laparoscopic management of ureteral endometriosis: our experience. *J Minim Invasive Gynecol* 2007;**14**:169–171.
- Friggi Sebe Petrelluzzi K, Garcia MC, Petta CA, Ribeiro DA, de Oliveira Monteiro NR, Céspedes IC, Spadari RC. Physical therapy and psychological intervention normalize cortisol levels and improve vitality in women with endometriosis. *J Psychosom Obstet Gynaecol* 2012;**33**:191–198.
- Garry R, Clayton R, Hawe J. The effect of endometriosis and its radical laparoscopic excision on quality of life indicators. *BJOG* 2000;**107**:44–54.
- Gerlinger C, Schmelter T. Determining the non-inferiority margin for patient reported outcomes. *Pharm Stat* 2011;**10**:410–413.
- Gerlinger C, Schumacher U, Faustmann T, Colligs A, Schmitz H, Seitz C. Defining a minimal clinically important difference for endometriosis-associated pelvic pain measured on a visual analog scale: analyses of two placebo-controlled, randomized trials. *Health Qual Life Outcomes* 2010;**8**:138.
- Gerlinger C, Faustmann T, Hassall JJ, Seitz C. Treatment of endometriosis in different ethnic populations: a meta-analysis of two clinical trials. *BMC Womens Health* 2012a;**12**:9.
- Gerlinger C, Schumacher U, Wentzack R, Uhl-Hochgräber K, Solomayer EF, Schmitz H, Faustmann T, Seitz C. How can we measure endometriosis-associated pelvic pain? *J Endometriosis* 2012b;**4**:109–116.
- Gestrinone Italian Study Group. Gestrinone versus a gonadotropin-releasing hormone agonist for the treatment of pelvic pain associated with endometriosis: a multicenter, randomized, double-blind study. *Fertil Steril* 1996;**66**:911–919.
- Ghahiri A, Najafian A, Ghasemi M, Najafian A. Comparison study on effectiveness of pentoxifyllin with LD to prevent recurrent endometriosis. *Iran J Reprod Med* 2012;**10**:219.
- Gomes MK, Ferriani RA, Rosa e Silva JC, Japur de Sa Rosa e Silva AC, Vieira CS, Candido dos Reis FJ. The levonorgestrel-releasing intrauterine system and endometriosis staging. *Fertil Steril* 2007;**87**:1231–1234.
- Gordon SJ, Maher PJ, Hiscock R. The effect of intraperitoneal ropivacaine on pain after laparoscopic excision of endometriosis. *J Am Assoc Gynecol Laparosc* 2002;**9**:29–34.
- Goulet JL, Brandt C, Crystal S, Fiellin DA, Gibert C, Gordon AJ, Kerns RD, Maisto S, Justice AC. Agreement between electronic medical record-based and self-administered pain numeric rating scale: clinical and research implications. *Med Care* 2013;**51**:245–250.
- Gregoriou O, Konidaris S, Vitoratos N, Papadias C, Papoulis I, Chryssicopoulos A. Gonadotropin-releasing hormone analogue plus hormone replacement therapy for the treatment of endometriosis: a randomized controlled trial. *Int J Fertil Womens Med* 1997;**42**:406–411.
- Gruppo Italiano per lo Studio dell'Endometriosi. Relationship between stage, site and morphological characteristics of pelvic endometriosis and pain. *Hum Reprod* 2001;**16**:2668–2671.
- Guyatt GH, Osoba D, Wu AW, Wyrwich KW, Norman GR, Clinical Significance Consensus Meeting G. Methods to explain the clinical significance of health status measures. *Mayo Clin Proc* 2002;**77**:371–383.
- Guzick DS, Huang LS, Broadman BA, Nealon M, Hornstein MD. Randomized trial of leuprolide versus continuous oral contraceptives in the treatment of endometriosis-associated pelvic pain. *Fertil Steril* 2011;**95**:1568–1573.
- Harada T, Momoeda M, Taketani Y, Hoshiai H, Terakawa N. Low-dose oral contraceptive pill for dysmenorrhea associated with endometriosis: a placebo-controlled, double-blind, randomized trial. *Fertil Steril* 2008;**90**:1583–1588.

- Harada T, Momoeda M, Taketani Y, Aso T, Fukunaga M, Hagino H, Terakawa N. Dienogest is as effective as intranasal buserelin acetate for the relief of pain symptoms associated with endometriosis—a randomized, double-blind, multicenter, controlled trial. *Fertil Steril* 2009;**91**:675–681.
- Harrison RF, Barry-Kinsella C. Efficacy of medroxyprogesterone treatment in infertile women with endometriosis: a prospective, randomized, placebo-controlled study. *Fertil Steril* 2000;**74**:24–30.
- Hawker GA, Mian S, Kendzerska T, French M. Measures of adult pain: Visual Analog Scale for Pain (VAS Pain), Numeric Rating Scale for Pain (NRS Pain), McGill Pain Questionnaire (MPQ), Short-Form McGill Pain Questionnaire (SF-MPQ), Chronic Pain Grade Scale (CPGS), Short Form-36 Bodily Pain Scale (SF-36 BPS), and Measure of Intermittent and Constant Osteoarthritis Pain (ICOAP). *Arthritis Care Res (Hoboken)* 2011;**63**(Suppl. 11):S240–S252.
- He W, Liu X, Zhang Y, Guo SW. Generalized hyperalgesia in women with endometriosis and its resolution following a successful surgery. *Reprod Sci* 2010;**17**:1099–1111.
- Healey M, Ang WC, Cheng C. Surgical treatment of endometriosis: a prospective randomized double-blinded trial comparing excision and ablation. *Fertil Steril* 2010;**94**:2536–2540.
- Hefler LA, Grimm C, van Trotsenburg M, Nagele F. Role of the vaginally administered aromatase inhibitor anastrozole in women with rectovaginal endometriosis: a pilot study. *Fertil Steril* 2005;**84**:1033–1036.
- Hjermstad MJ, Fayers PM, Haugen DF, Caraceni A, Hanks GW, Loge JH, Fainsinger R, Aass N, Kaasa S. European Palliative Care Research C. Studies comparing Numerical Rating Scales, Verbal Rating Scales, and Visual Analogue Scales for assessment of pain intensity in adults: a systematic literature review. *J Pain Symptom Manage* 2011;**41**:1073–1093.
- Hill NC, El-Toukhy T, Chandakas S, Grigoriades T, Erian J. Safety of the Helica Thermal Coagulator in treatment of early stage endometriosis. *J Obstet Gynaecol* 2005;**25**:52–54.
- Hong JY. The effect of preoperative ketorolac on WBC response and pain in laparoscopic surgery for endometriosis. *Yonsei Med J* 2005;**46**:812–817.
- Hornstein MD, Hemmings R, Yuzpe AA, Heinrichs WL. Use of nafarelin versus placebo after reductive laparoscopic surgery for endometriosis. *Fertil Steril* 1997a;**68**:860–864.
- Hornstein MD, Yuzpe AA, Burry K, Buttram VC Jr, Heinrichs LR, Soderstrom RM, Steinberger E, Lin JS. Retreatment with nafarelin for recurrent endometriosis symptoms: efficacy, safety, and bone mineral density. *Fertil Steril* 1997b;**67**:1013–1018.
- Hornstein MD, Surrey ES, Weisberg GW, Casino LA. Leuprolide acetate depot and hormonal add-back in endometriosis: a 12-month study. Lupron Add-Back Study Group. *Obstet Gynecol* 1998;**91**:16–24.
- Howard FM. Chronic pelvic pain. *Obstet Gynecol* 2003;**101**:594–611.
- Howard FMP, Carter JE, Perry CP. *Pelvic Pain. Diagnosis and Management*. Philadelphia, PA: Lippincott Williams and Wilkins, 2000.
- Hsu AL, Sinaii N, Segars J, Nieman LK, Stratton P. Relating pelvic pain location to surgical findings of endometriosis. *Obstet Gynecol* 2011;**118**:223–230.
- Huber AV, Huber JC, Kolbus A, Imhof M, Nagele F, Loizou D, Kaufmann U, Singer CF. Systemic HCG treatment in patients with endometriosis: a new perspective for a painful disease. *Wien Klin Wochenschr* 2004;**116**:839–843.
- Hurst BS, Gardner SC, Tucker KE, Awoniyi CA, Schlaff WD. Delayed oral estradiol combined with leuprolide increases endometriosis-related pain. *JSL* 2000;**4**:97–101.
- Ikeda F, Vanni D, Vasconcelos A, Podgaec S, Abrao MS. Microlaparoscopy vs. conventional laparoscopy for the management of early-stage pelvic endometriosis: a comparison. *J Reprod Med* 2005;**50**:771–778.
- Issa B, Onon TS, Agrawal A, Shekhar C, Morris J, Hamdy S, Whorwell PJ. Visceral hypersensitivity in endometriosis: a new target for treatment? *Gut* 2012;**61**:367–372.
- Jedrejczak P, Sokalska A, Spaczynski RZ, Duleba AJ, Pawelczyk L. Effects of presacral neurectomy on pelvic pain in women with and without endometriosis. *Ginekol Pol* 2009;**80**:172–178.
- Johnson NP, Farquhar CM, Crossley S, Yu Y, Van Peperstraten AM, Sprecher M, Suckling J. A double-blind randomised controlled trial of laparoscopic uterine nerve ablation for women with chronic pelvic pain. *BJOG* 2004;**111**:950–959.
- Jones KD, Sutton C. Patient satisfaction and changes in pain scores after ablative laparoscopic surgery for stage III-IV endometriosis and endometriotic cysts. *Fertil Steril* 2003;**79**:1086–1090.
- Jones KD, Haines P, Sutton CJ. Long-term follow-up of a controlled trial of laser laparoscopy for pelvic pain. *s* 2001;**5**:111–115.
- Kaiser A, Kopf A, Gericke C, Bartley J, Mechsner S. The influence of peritoneal endometriotic lesions on the generation of endometriosis-related pain and pain reduction after surgical excision. *Arch Gynecol Obstet* 2009;**280**:369–373.
- Kamencic H, Thiel JA. Pentoxifylline after conservative surgery for endometriosis: a randomized, controlled trial. *J Minim Invasive Gynecol* 2008;**15**:62–66.
- Kaminski K, Fiegler P, Marr J, Moore C. Treatment of endometriosis with dienogest: preliminary report. *Ginekol Pol* 2001;**72**:299–304.
- Karp BI, Sinaii N, Nieman LK, Silberstein SD, Stratton P. Migraine in women with chronic pelvic pain with and without endometriosis. *Fertil Steril* 2011;**95**:895–899.
- Kaser DJ, Missmer SA, Berry KF, Laufer MR. Use of norethindrone acetate alone for postoperative suppression of endometriosis symptoms. *J Pediatr Adolesc Gynecol* 2012;**25**:105–108.
- Kaupilla A, Ronnberg L. Naproxen sodium in dysmenorrhea secondary to endometriosis. *Obstet Gynecol* 1985;**65**:379–383.
- Kettel LM, Murphy AA, Morales AJ, Ulmann A, Baulieu EE, Yen SS. Treatment of endometriosis with the antiprogestone mifepristone (RU486). *Fertil Steril* 1996;**65**:23–28.
- Kettel LM, Murphy AA, Morales AJ, Yen SS. Preliminary report on the treatment of endometriosis with low-dose mifepristone (RU 486). *Am J Obstet Gynecol* 1998;**178**:1151–1156.
- Kim NY, Ryoo U, Lee DY, Kim MJ, Yoon BK, Choi D. The efficacy and tolerability of short-term low-dose estrogen-only add-back therapy during post-operative GnRH agonist treatment for endometriosis. *Eur J Obstet Gynecol Reprod Biol* 2011;**154**:85–89.
- King MT. A point of minimal important difference (MID): a critique of terminology and methods. *Expert Rev Pharmacoecon Outcomes Res* 2011;**11**:171–184.
- Kitawaki J, Ishihara H, Kiyomizu M, Honjo H. Maintenance therapy involving a tapering dose of danazol or mid/low doses of oral contraceptive after gonadotropin-releasing hormone agonist treatment for endometriosis-associated pelvic pain. *Fertil Steril* 2008;**89**:1831–1835.
- Kitawaki J, Kusuki I, Yamanaka K, Suganuma I. Maintenance therapy with dienogest following gonadotropin-releasing hormone agonist treatment for endometriosis-associated pelvic pain. *Eur J Obstet Gynecol Reprod Biol* 2011;**157**:212–216.
- Koninckx PR, Craessaerts M, Timmerman D, Cornillie F, Kennedy S. Anti-TNF-alpha treatment for deep endometriosis-associated pain: a randomized placebo-controlled trial. *Hum Reprod* 2008;**23**:2017–2023.
- Kovoor E, Nassif J, Miranda-Mendoza I, Wattiez A. Endometriosis of bladder: outcomes after laparoscopic surgery. *J Minim Invasive Gynecol* 2010;**17**:600–604.
- Kristensen J, Kjer JJ. Laparoscopic laser resection of rectovaginal pouch and rectovaginal septum endometriosis: the impact on pelvic pain and quality of life. *Acta Obstet Gynecol Scand* 2007;**86**:1467–1471.
- Kwok A, Lam A, Ford R. Laparoscopic presacral neurectomy—retrospective series. *Aust N Z J Obstet Gynaecol* 2001;**41**:195–197.
- Landi S, Ceccaroni M, Perutelli A, Allodi C, Barbieri F, Fiaccavento A, Ruffo G, McVeigh E, Zanolta L, Minelli L. Laparoscopic nerve-sparing complete excision of deep endometriosis: is it feasible? *Hum Reprod* 2006;**21**:774–781.
- Landi S, Mereu L, Pontrelli G, Stepniewska A, Romano L, Tateo S, Dorizzi C, Minelli L. The influence of adenomyosis in patients laparoscopically treated for deep endometriosis. *J Minim Invasive Gynecol* 2008;**15**:566–570.
- Laursen BS, Bajaj P, Olesen AS, Delmar C, Arendt-Nielsen L. Health related quality of life and quantitative pain measurement in females with chronic non-malignant pain. *Eur J Pain* 2005;**9**:267–275.
- Lijoi D, Ferrero S, Mistrangelo E, Casa ID, Crosa M, Remorgida V, Alessandri F. Bowel preparation before laparoscopic gynaecological surgery in benign conditions using a 1-week low fibre diet: a surgeon blind, randomized and controlled trial. *Arch Gynecol Obstet* 2009;**280**:713–718.
- Ling FW. Randomized controlled trial of depot leuprolide in patients with chronic pelvic pain and clinically suspected endometriosis. Pelvic Pain Study Group. *Obstet Gynecol* 1999;**93**:51–58.
- Lockhat FB, Emembolu JO, Konje JC. The efficacy, side-effects and continuation rates in women with symptomatic endometriosis undergoing treatment with an intra-uterine administered progestogen (levonorgestrel): a 3 year follow-up. *Hum Reprod* 2005;**20**:789–793.
- Long QQ, Zhang SF, Han Y, Chen H, Li XL, Hua KQ, Hu WG. Clinical efficacy and safety of gonadotropin releasing hormone agonist combined with estrogen-

- dydrogesterone in treatment of endometriosis. *Zhonghua Fu Chan Ke Za Zhi* 2010; **45**:247–251.
- Loverro G, Carriero C, Rossi AC, Putignano G, Nicolardi V, Selvaggi L. A randomized study comparing triptorelin or expectant management following conservative laparoscopic surgery for symptomatic stage III-IV endometriosis. *Eur J Obstet Gynecol Reprod Biol* 2008; **136**:194–198.
- Lukanova M, Popov I. Chronic pelvic pain and combined oral hormonal contraception. *Akush Ginekol (Sofia)* 2008; **47**:20–29.
- Lv D, Song H, Shi G. Anti-TNF-alpha treatment for pelvic pain associated with endometriosis. *Cochrane Database Syst Rev* 2010;CD008088.
- Lyons SD, Chew SS, Thomson AJ, Lenart M, Camaris C, Vancaillie TG, Abbott JA. Clinical and quality-of-life outcomes after fertility-sparing laparoscopic surgery with bowel resection for severe endometriosis. *J Minim Invasive Gynecol* 2006; **13**:436–441.
- Mabrouk M, Montanari G, Guerrini M, Villa G, Solfrini S, Vicenzi C, Mignemi G, Zannoni L, Frasca C, Di Donato N et al. Does laparoscopic management of deep infiltrating endometriosis improve quality of life? A prospective study. *Health Qual Life Outcomes* 2011; **9**:98.
- Mabrouk M, Montanari G, Di Donato N, Del Forno S, Frasca C, Geraci E, Ferrini G, Vicenzi C, Raimondo D, Villa G et al. What is the impact on sexual function of laparoscopic treatment and subsequent combined oral contraceptive therapy in women with deep infiltrating endometriosis? *J Sex Med* 2012; **9**:770–778.
- Maia H Jr, Haddad C, Pinheiro N, Casoy J. Advantages of the association of resveratrol with oral contraceptives for management of endometriosis-related pain. *Int J Womens Health* 2012; **4**:543–549.
- Manwaring JM, Readman E, Maher PJ. The effect of heated humidified carbon dioxide on postoperative pain, core temperature, and recovery times in patients having laparoscopic surgery: a randomized controlled trial. *J Minim Invasive Gynecol* 2008; **15**:161–165.
- Martellucci J, Naldini G, Del Popolo G, Carriero A. Sacral nerve modulation in the treatment of chronic pain after pelvic surgery. *Colorectal Dis* 2012; **14**:502–507.
- Martin CE, Johnson E, Wechter ME, Leserman J, Zolnoun DA. Catastrophizing: a predictor of persistent pain among women with endometriosis at 1 year. *Hum Reprod* 2011; **26**:3078–3084.
- McKinnon B, Bersinger NA, Wotzkow C, Mueller MD. Endometriosis-associated nerve fibers, peritoneal fluid cytokine concentrations, and pain in endometriotic lesions from different locations. *Fertil Steril* 2012; **97**:373–380.
- Mereu L, Gagliardi ML, Clarizia R, Mainardi P, Landi S, Minelli L. Laparoscopic management of ureteral endometriosis in case of moderate-severe hydronephrosis. *Fertil Steril* 2010; **93**:46–51.
- Mereu L, Florio P, Carri G, Pontis A, Petraglia F, Mencaglia L. Clinical outcomes associated with surgical treatment of endometrioma coupled with resection of the posterior broad ligament. *Int J Gynaecol Obstet* 2012; **116**:57–60.
- Mettler L, Steinmüller H, Schachner-Wünschmann E. Experience with a depot GnRH-agonist (Zoladex) in the treatment of genital endometriosis. *Hum Reprod* 1991; **6**:694–698.
- Milingos S, Protopapas A, Drakakis P, Liapi A, Loutradis D, Kallipolitis G, Milingos D, Michalas S. Laparoscopic management of patients with endometriosis and chronic pelvic pain. *Ann N Y Acad Sci* 2003; **997**:269–273.
- Miller JD. Quantification of endometriosis-associated pain and quality of life during the stimulatory phase of gonadotropin-releasing hormone agonist therapy: a double-blind, randomized, placebo-controlled trial. *Am J Obstet Gynecol* 2000; **182**:1483–1488.
- Minelli L, Fanfani F, Fagotti A, Ruffo G, Ceccaroni M, Mereu L, Landi S, Pomini P, Scambia G. Laparoscopic colorectal resection for bowel endometriosis: feasibility, complications, and clinical outcome. *Arch Surg* 2009; **144**:234–239; discussion 239.
- Minelli L, Ceccaroni M, Ruffo G, Bruni F, Pomini P, Pontrelli G, Rolla M, Scioscia M. Laparoscopic conservative surgery for stage IV symptomatic endometriosis: short-term surgical complications. *Fertil Steril* 2010; **94**:1218–1222.
- Miranda-Mendoza I, Kovoov E, Nassif J, Ferreira H, Wattiez A. Laparoscopic surgery for severe ureteric endometriosis. *Eur J Obstet Gynecol Reprod Biol* 2012; **165**:275–279.
- Missmer SA, Bove GM. A pilot study of the prevalence of leg pain among women with endometriosis. *J Bodyw Mov Ther* 2011; **15**:304–308.
- Momoeda M, Harada T, Terakawa N, Aso T, Fukunaga M, Hagino H, Taketani Y. Long-term use of dienogest for the treatment of endometriosis. *J Obstet Gynaecol Res* 2009; **35**:1069–1076.
- Moravek MB, Ward EA, Lebovic DI. Thiazolidinediones as therapy for endometriosis: a case series. *Gynecol Obstet Invest* 2009; **68**:167–170.
- Morgante G, Ditto A, La Marca A, De Leo V. Low-dose danazol after combined surgical and medical therapy reduces the incidence of pelvic pain in women with moderate and severe endometriosis. *Hum Reprod* 1999; **14**:2371–2374.
- Muzii L, Marana R, Caruana P, Catalano GF, Margutti F, Panici PB. Postoperative administration of monophasic combined oral contraceptives after laparoscopic treatment of ovarian endometriomas: a prospective, randomized trial. *Am J Obstet Gynecol* 2000; **183**:588–592.
- Muzii L, Maneschi F, Marana R, Porpora MG, Zupi E, Bellati F, Angioli R, Benedetti Panici P. Oral estroprogestins after laparoscopic surgery to excise endometriomas: continuous or cyclic administration? Results of a multicenter randomized study. *J Minim Invasive Gynecol* 2011; **18**:173–178.
- Napadow V, Edwards RR, Cahalan CM, Mensing G, Greenbaum S, Valovska A, Li A, Kim J, Maeda Y, Park K et al. Evoked pain analgesia in chronic pelvic pain patients using respiratory-gated auricular vagal afferent nerve stimulation. *Pain Med* 2012; **13**:777–789.
- Nardo LG, Moustafa M, Gareth Beynon DW. Laparoscopic treatment of pelvic pain associated with minimal and mild endometriosis with use of the Helica Thermal Coagulator. *Fertil Steril* 2005; **83**:735–738.
- Nnoaham KE, Hummelshoj L, Webster P, d'Hooghe T, de Cicco Nardone F, de Cicco Nardone C, Jenkinson C, Kennedy SH, Zondervan KT. World Endometriosis Research Foundation Global Study of Women's Health Consortium. Impact of endometriosis on quality of life and work productivity: a multicenter study across ten countries. *Fertil Steril* 2011; **96**:366–373 e368.
- Parazzini F, Fedele L, Busacca M, Falsetti L, Pellegrini S, Venturini PL, Stella M. Postsurgical medical treatment of advanced endometriosis: results of a randomized clinical trial. *Am J Obstet Gynecol* 1994; **171**:1205–1207.
- Parazzini F, Di Cintio E, Chatenoud L, Moroni S, Ardovino I, Struzziero E, Falsetti L, Bianchi A, Bracco G, Pellegrini A et al. Estroprogestin vs. gonadotrophin agonists plus estroprogestin in the treatment of endometriosis-related pelvic pain: a randomized trial. Gruppo Italiano per lo Studio dell'Endometriosi. *Eur J Obstet Gynecol Reprod Biol* 2000; **88**:11–14.
- Parazzini F, Pelucchi C, Negri E, Franceschi S, Talamini R, Montella M, La Vecchia C. Use of fertility drugs and risk of ovarian cancer. *Hum Reprod* 2001; **16**:1372–1375.
- Parazzini F, Mais V, Cipriani S; Gruppo Italiano per lo Studio dell'Endometriosi. Adhesions and pain in women with first diagnosis of endometriosis: results from a cross-sectional study. *J Minim Invasive Gynecol* 2006; **13**:49–54.
- Parker JD, Leondires M, Sinaii N, Premkumar A, Nieman LK, Stratton P. Persistence of dysmenorrhea and nonmenstrual pain after optimal endometriosis surgery may indicate adenomyosis. *Fertil Steril* 2006; **86**:711–715.
- Petraglia F, Hornung D, Seitz C, Faustmann T, Gerlinger C, Luisi S, Lazzeri L, Strowitzki T. Reduced pelvic pain in women with endometriosis: efficacy of long-term dienogest treatment. *Arch Gynecol Obstet* 2012; **285**:167–173.
- Petta CA, Ferriani RA, Abrao MS, Hassan D, Rosa ESJC, Podgaec S, Bahamondes L. Randomized clinical trial of a levonorgestrel-releasing intrauterine system and a depot GnRH analogue for the treatment of chronic pelvic pain in women with endometriosis. *Hum Reprod* 2005; **20**:1993–1998.
- Porpora MG, Pallante D, Ferro A, Crisafi B, Bellati F, Benedetti Panici P. Pain and ovarian endometrioma recurrence after laparoscopic treatment of endometriosis: a long-term prospective study. *Fertil Steril* 2010; **93**:716–721.
- Possover M, Schneider T, Henle KP. Laparoscopic therapy for endometriosis and vascular entrapment of sacral plexus. *Fertil Steril* 2011; **95**:756–758.
- Radosa MP, Bernardi TS, Georgiev I, Diebold H, Camara O, Runnebaum IB. Coagulation versus excision of primary superficial endometriosis: a 2-year follow-up. *Eur J Obstet Gynecol Reprod Biol* 2010; **150**:195–198.
- Razzi S, Luisi S, Ferretti C, Calonaci F, Gabbanini M, Mazzini M, Petraglia F. Use of a progestogen only preparation containing desogestrel in the treatment of recurrent pelvic pain after conservative surgery for endometriosis. *Eur J Obstet Gynecol Reprod Biol* 2007; **135**:188–190.
- Redwine DB. Remote recollection of preoperative pain in patients undergoing excision of endometriosis. *J Am Assoc Gynecol Laparosc* 1994; **1**:140–145.
- Regidor PA, Regidor M, Kato K, Bier UW, Bühler K, Schindler AE. Long-term follow-up on the treatment of endometriosis with the GnRH-agonist buserelinacetate. Long-term follow-up data (up to 98 months) of 42 patients with endometriosis who were treated with GnRH-agonist buserelinacetate (Suprecur), were evaluated in respect

- of recurrence of pain symptoms and pregnancy outcome. *Eur J Obstet Gynecol Reprod Biol* 1997;**73**:153–160.
- Reichel RP, Schweppe KW. Goserelin (Zoladex) depot in the treatment of endometriosis. Zoladex Endometriosis Study Group. *Fertil Steril* 1992;**57**:1197–1202.
- Remorgida V, Abbamonte HL, Ragni N, Fulcheri E, Ferrero S. Letrozole and norethisterone acetate in rectovaginal endometriosis. *Fertil Steril* 2007a;**88**:724–726.
- Remorgida V, Abbamonte LH, Ragni N, Fulcheri E, Ferrero S. Letrozole and desogestrel-only contraceptive pill for the treatment of stage IV endometriosis. *Aust N Z J Obstet Gynaecol* 2007b;**47**:222–225.
- Revicki DA, Cella D, Hays RD, Sloan JA, Lenderking WR, Aaronson NK. Responsiveness and minimal important differences for patient reported outcomes. *Health Qual Life Outcomes* 2006;**4**:70.
- Rock JA, Truglia JA, Caplan RJ. Zoladex (goserelin acetate implant) in the treatment of endometriosis: a randomized comparison with danazol. The Zoladex Endometriosis Study Group. *Obstet Gynecol* 1993;**82**:198–205.
- Rodriguez CS. Pain measurement in the elderly: a review. *Pain Manag Nurs* 2001;**2**:38–46.
- Roghaei MA, Tehrani HG, Taherian A, Koleini N. Evaluation of effects of letrozole compare to danazole in patients confirmed endometriosis: a randomized clinical trial. *J Isfahan Med Sch* 2010;**28**:416–424.
- Roman H, Gromez A, Hochain P, Maroteau-Pasquier N, Tuech JJ, Resch B, Marpeau L. Is painful rectovaginal endometriosis an intermediate stage of rectal endometriosis? *Fertil Steril* 2008;**90**:1014–1018.
- Roman JD. Adolescent endometriosis in the Waikato region of New Zealand—a comparative cohort study with a mean follow-up time of 2.6 years. *Aust N Z J Obstet Gynaecol* 2010a;**50**:179–183.
- Roman JD. Surgical treatment of endometriosis in private practice: cohort study with mean follow-up of 3 years. *J Minim Invasive Gynecol* 2010b;**17**:42–46.
- Roman H, Loisel C, Resch B, Tuech JJ, Hochain P, Leroi AM, Marpeau L. Delayed functional outcomes associated with surgical management of deep rectovaginal endometriosis with rectal involvement: giving patients an informed choice. *Hum Reprod* 2010;**25**:890–899.
- Romão APMS, Gorayeb R, Romão GS, Poli-Neto OB, dos Reis FJC, Rosa-e-Silva JC, Nogueira AA. High levels of anxiety and depression have a negative effect on quality of life of women with chronic pelvic pain. *Int J Clin Pract* 2009;**63**:707–711.
- Rubi-Klein K, Kucera-Sliutz E, Nissel H, Bijak M, Stockenhuber D, Fink M, Wolkenstein E. Is acupuncture in addition to conventional medicine effective as pain treatment for endometriosis? A randomised controlled cross-over trial. *Eur J Obstet Gynecol Reprod Biol* 2010;**153**:90–93.
- Santanam N, Kavtaradze N, Murphy A, Dominguez C, Parthasarathy S. Antioxidant supplementation reduces endometriosis-related pelvic pain in humans. *Transl Res* 2013;**161**:189–195.
- Schlaff WD, Dugoff L, Damewood MD, Rock JA. Megestrol acetate for treatment of endometriosis. *Obstet Gynecol* 1990;**75**:646–648.
- Schlaff WD, Carson SA, Luciano A, Ross D, Bergqvist A. Subcutaneous injection of depot medroxyprogesterone acetate compared with leuprolide acetate in the treatment of endometriosis-associated pain. *Fertil Steril* 2006;**85**:314–325.
- Seracchioli R, Poggioli G, Pierangeli F, Manuzzi L, Gualerzi B, Savelli L, Remorgida V, Mabrouk M, Venturoli S. Surgical outcome and long-term follow up after laparoscopic resectosigmoid resection in women with deep infiltrating endometriosis. *BJOG* 2007;**114**:889–895.
- Seracchioli R, Mabrouk M, Guerrini M, Manuzzi L, Savelli L, Frascà C, Venturoli S. Dyschezia and posterior deep infiltrating endometriosis: analysis of 360 cases. *J Minim Invasive Gynecol* 2008;**15**:695–699.
- Seracchioli R, Mabrouk M, Frasca C, Manuzzi L, Savelli L, Venturoli S. Long-term oral contraceptive pills and postoperative pain management after laparoscopic excision of ovarian endometrioma: a randomized controlled trial. *Fertil Steril* 2010a;**94**:464–471.
- Seracchioli R, Mabrouk M, Montanari G, Manuzzi L, Concetti S, Venturoli S. Conservative laparoscopic management of urinary tract endometriosis (UTE): surgical outcome and long-term follow-up. *Fertil Steril* 2010b;**94**:856–861.
- Sesti F, Pietropoli A, Capozzolo T, Broccoli P, Pierangeli S, Bollea MR, Piccione E. Hormonal suppression treatment or dietary therapy versus placebo in the control of painful symptoms after conservative surgery for endometriosis stage III-IV. A randomized comparative trial. *Fertil Steril* 2007;**88**:1541–1547.
- Setälä M, Harkki P, Matomaki J, Makinen J, Kossi J. Sexual functioning, quality of life and pelvic pain 12 months after endometriosis surgery including vaginal resection. *Acta Obstet Gynecol Scand* 2012;**91**:692–698.
- Shaw RW. Nafarelin in the treatment of pelvic pain caused by endometriosis. *Am J Obstet Gynecol* 1990;**162**:574–576.
- Shi J, Leng J, Cui Q, Lang J. Follicle loss after laparoscopic treatment of ovarian endometriotic cysts. *Int J Gynaecol Obstet* 2011;**115**:277–281.
- Souza CA, Oliveira LM, Scheffel C, Genro VK, Rosa V, Chaves MF, Cunha Filho JS. Quality of life associated to chronic pelvic pain is independent of endometriosis diagnosis—a cross-sectional survey. *Health Qual Life Outcomes* 2011;**9**:41.
- Soysal ME, Soysal S, Gurses E, Ozer S. Laparoscopic presacral neurolysis for endometriosis-related pelvic pain. *Hum Reprod* 2003;**18**:588–592.
- Soysal S, Soysal ME, Ozer S, Gul N, Gezgin T. The effects of post-surgical administration of goserelin plus anastrozole compared to goserelin alone in patients with severe endometriosis: a prospective randomized trial. *Hum Reprod* 2004;**19**:160–167.
- Stepniewska A, Pomini P, Bruni F, Mereu L, Ruffo G, Ceccaroni M, Scioscia M, Guerriero M, Minelli L. Laparoscopic treatment of bowel endometriosis in infertile women. *Hum Reprod* 2009;**24**:1619–1625.
- Stepniewska A, Pomini P, Scioscia M, Mereu L, Ruffo G, Minelli L. Fertility and clinical outcome after bowel resection in infertile women with endometriosis. *Reprod Biomed Online* 2010;**20**:602–609.
- Stratton P, Berkley KJ. Chronic pelvic pain and endometriosis: translational evidence of the relationship and implications. *Hum Reprod Update* 2011;**17**:327–346.
- Stratton P, Sinaii N, Segars J, Koziol D, Wesley R, Zimmer C, Winkler C, Nieman LK. Return of chronic pelvic pain from endometriosis after raloxifene treatment: a randomized controlled trial. *Obstet Gynecol* 2008;**111**:88–96.
- Strowitzki T, Faustmann T, Gerlinger C, Seitz C. Dienogest in the treatment of endometriosis-associated pelvic pain: a 12-week, randomized, double-blind, placebo-controlled study. *Eur J Obstet Gynecol Reprod Biol* 2010a;**151**:193–198.
- Strowitzki T, Marr J, Gerlinger C, Faustmann T, Seitz C. Dienogest is as effective as leuprolide acetate in treating the painful symptoms of endometriosis: a 24-week, randomized, multicentre, open-label trial. *Hum Reprod* 2010b;**25**:633–641.
- Strowitzki T, Marr J, Gerlinger C, Faustmann T, Seitz C. Detailed analysis of a randomized, multicenter, comparative trial of dienogest versus leuprolide acetate in endometriosis. *Int J Gynaecol Obstet* 2012;**117**:228–233.
- Surrey ES, Hornstein MD. Prolonged GnRH agonist and add-back therapy for symptomatic endometriosis: long-term follow-up. *Obstet Gynecol* 2002;**99**:709–719.
- Sutton CJ, Ewen SP, Whitelaw N, Haines P. Prospective, randomized, double-blind, controlled trial of laser laparoscopy in the treatment of pelvic pain associated with minimal, mild, and moderate endometriosis. *Fertil Steril* 1994;**62**:696–700.
- Sutton CJ, Pooley AS, Ewen SP, Haines P. Follow-up report on a randomized controlled trial of laser laparoscopy in the treatment of pelvic pain associated with minimal to moderate endometriosis. *Fertil Steril* 1997;**68**:1070–1074.
- Takeuchi H, Jinushi M, Nakano Y, Sato Y, Toyonari Y, Mizushima A, Kuwabara Y. Comparison of anesthetic methods for microlaparoscopy in women with unexplained infertility. *J Am Assoc Gynecol Laparosc* 1999;**6**:453–457.
- Tandoi I, Somigliana E, Riparini J, Ronzoni S, Viganò P, Candiani M. High rate of endometriosis recurrence in young women. *J Pediatr Adolesc Gynecol* 2011;**24**:376–379.
- Tanmahasamut P, Rattanachaiyanont M, Angsuwathana S, Techatrakaisak K, Indhavivadhana S, Leerasing P. Postoperative levonorgestrel-releasing intrauterine system for pelvic endometriosis-related pain: a randomized controlled trial. *Obstet Gynecol* 2012;**119**:519–526.
- Thomassin I, Bazot M, Detchev R, Barranger E, Cortez A, Darai E. Symptoms before and after surgical removal of colorectal endometriosis that are assessed by magnetic resonance imaging and rectal endoscopic sonography. *Am J Obstet Gynecol* 2004;**190**:1264–1271.
- Tjaden B, Schlaff WD, Kimball A, Rock JA. The efficacy of presacral neurectomy for the relief of midline dysmenorrhea. *Obstet Gynecol* 1990;**76**:89–91.
- Tracey I, Bushnell MC. How neuroimaging studies have challenged us to rethink: is chronic pain a disease? *J Pain* 2009;**10**:1113–1120.
- Trivedi P, Selvaraj K, Mahapatra PD, Srivastava S, Malik S. Effective post-laparoscopic treatment of endometriosis with dydrogesterone. *Gynecol Endocrinol* 2007;**23**(Suppl. 1):73–76.



- Tummon IS, Pepping ME, Binor Z, Radwanska E, Dmowski WP. A randomized, prospective comparison of endocrine changes induced with intranasal leuprolide or danazol for treatment of endometriosis. *Fertil Steril* 1989;**51**:390–394.
- Turk DC, Dworkin RH, Allen RR, Bellamy N, Brandenburg N, Carr DB, Cleeland C, Dionne R, Farrar JT, Galer BS et al. Core outcome domains for chronic pain clinical trials: IMMPACT recommendations. *Pain* 2003;**106**:337–345.
- U.S. Department of Health and Human Services FDA Center for Drug Evaluation and Research; U.S. Department of Health and Human Services FDA Center for Biologics Evaluation and Research; U.S. Department of Health and Human Services FDA Center for Devices and Radiological Health. Guidance for industry: patient-reported outcome measures: use in medical product development to support labeling claims: draft guidance, 2009. <http://www.fda.gov/downloads/Drugs/Guidances/UCM193282.pdf>.
- Valiani M, Ghasemi N, Bahadoran P, Heshmat R. The effects of massage therapy on dysmenorrhea caused by endometriosis. *Iran J Nurs Midwifery Res* 2010;**15**:167–171.
- Vercellini P, Fedele L, Molteni P, Arcaini L, Bianchi S, Candiani GB. Laparoscopy in the diagnosis of gynecologic chronic pelvic pain. *Int J Gynaecol Obstet* 1990;**32**:261–265.
- Vercellini P, Boccione L, Vendola N, Colombo A, Rognoni MT, Fedele L. Peritoneal endometriosis. Morphologic appearance in women with chronic pelvic pain. *J Reprod Med* 1991;**36**:533–536.
- Vercellini P, Trespidi L, Colombo A, Vendola N, Marchini M, Crosignani PG. A gonadotropin-releasing hormone agonist versus a low-dose oral contraceptive for pelvic pain associated with endometriosis. *Fertil Steril* 1993;**60**:75–79.
- Vercellini P, Trespidi L, Panazza S, Bramante T, Mauro F, Crosignani PG. Very low dose danazol for relief of endometriosis-associated pelvic pain: a pilot study. *Fertil Steril* 1994;**62**:1136–1142.
- Vercellini P, De Giorgi O, Oldani S, Cortesi I, Panazza S, Crosignani PG. Depot medroxyprogesterone acetate versus an oral contraceptive combined with very-low-dose danazol for long-term treatment of pelvic pain associated with endometriosis. *Am J Obstet Gynecol* 1996a;**175**:396–401.
- Vercellini P, Trespidi L, De Giorgi O, Cortesi I, Parazzini F, Crosignani PG. Endometriosis and pelvic pain: relation to disease stage and localization. *Fertil Steril* 1996b;**65**:299–304.
- Vercellini P, Cortesi I, De Giorgi O, Merlo D, Carinelli SG, Crosignani PG. Transvaginal ultrasonography versus uterine needle biopsy in the diagnosis of diffuse adenomyosis. *Hum Reprod* 1998;**13**:2884–2887.
- Vercellini P, Crosignani PG, Fadini R, Radici E, Belloni C, Sismondi P. A gonadotrophin-releasing hormone agonist compared with expectant management after conservative surgery for symptomatic endometriosis. *Br J Obstet Gynaecol* 1999a;**106**:672–677.
- Vercellini P, Aimi G, Panazza S, De Giorgi O, Pesole A, Crosignani PG. A levonorgestrel-releasing intrauterine system for the treatment of dysmenorrhea associated with endometriosis: a pilot study. *Fertil Steril* 1999b;**72**:505–508.
- Vercellini P, De Giorgi O, Mosconi P, Stellato G, Vicentini S, Crosignani PG. Cyproterone acetate versus a continuous monophasic oral contraceptive in the treatment of recurrent pelvic pain after conservative surgery for symptomatic endometriosis. *Fertil Steril* 2002;**77**:52–61.
- Vercellini P, Aimi G, Busacca M, Apolone G, Uglietti A, Crosignani PG. Laparoscopic uterosacral ligament resection for dysmenorrhea associated with endometriosis: results of a randomized, controlled trial. *Fertil Steril* 2003a;**80**:310–319.
- Vercellini P, Frontino G, De Giorgi O, Aimi G, Zaina B, Crosignani PG. Comparison of a levonorgestrel-releasing intrauterine device versus expectant management after conservative surgery for symptomatic endometriosis: a pilot study. *Fertil Steril* 2003b;**80**:305–309.
- Vercellini P, Frontino G, De Giorgi O, Pietropaolo G, Pasin R, Crosignani PG. Continuous use of an oral contraceptive for endometriosis-associated recurrent dysmenorrhea that does not respond to a cyclic pill regimen. *Fertil Steril* 2003c;**80**:560–563.
- Vercellini P, Pietropaolo G, De Giorgi O, Pasin R, Chiodini A, Crosignani PG. Treatment of symptomatic rectovaginal endometriosis with an estrogen-progestogen combination versus low-dose norethindrone acetate. *Fertil Steril* 2005;**84**:1375–1387.
- Vercellini P, Fedele L, Aimi G, Pietropaolo G, Consonni D, Crosignani PG. Association between endometriosis stage, lesion type, patient characteristics and severity of pelvic pain symptoms: a multivariate analysis of over 1000 patients. *Hum Reprod* 2006;**22**:266–271.
- Vercellini P, Barbara G, Somigliana E, Bianchi S, Abbiati A, Fedele L. Comparison of contraceptive ring and patch for the treatment of symptomatic endometriosis. *Fertil Steril* 2010;**93**:2150–2161.
- Vercellini P, Somigliana E, Consonni D, Frattaruolo MP, De Giorgi O, Fedele L. Surgical versus medical treatment for endometriosis-associated severe deep dyspareunia: I. Effect on pain during intercourse and patient satisfaction. *Hum Reprod* 2012;**27**:3450–3459.
- Vignali M, Bianchi S, Candiani M, Spadaccini G, Oggioni G, Busacca M. Surgical treatment of deep endometriosis and risk of recurrence. *J Minim Invasive Gynecol* 2005;**12**:508–513.
- Villa G, Mabrouk M, Guerrini M, Mignemi G, Montanari G, Fabbri E, Venturoli S, Seracchioli R. Relationship between site and size of bladder endometriotic nodules and severity of dysuria. *J Minim Invasive Gynecol* 2007;**14**:628–632.
- Vincent K, Kennedy S, Stratton P. Pain scoring in endometriosis: entry criteria and outcome measures for clinical trials. Report from the Art and Science of Endometriosis meeting. *Fertil Steril* 2010;**93**:62–67.
- Walch K, Unfried G, Huber J, Kurz C, van Trotsenburg M, Pernicka E, Wenzl R. Implanon versus medroxyprogesterone acetate: effects on pain scores in patients with symptomatic endometriosis—a pilot study. *Contraception* 2009;**79**:29–34.
- Wang PH, Fuh JL, Chao HT, Liu WM, Cheng MH, Chao KC. Is the surgical approach beneficial to subfertile women with symptomatic extensive adenomyosis? *J Obstet Gynaecol Res* 2009;**35**:495–502.
- Wayne PM, Kerr CE, Schnyer RN, Legedza AT, Savetsky-German J, Shields MH, Buring JE, Davis RB, Conboy LA, Highfield E et al. Japanese-style acupuncture for endometriosis-related pelvic pain in adolescents and young women: results of a randomized sham-controlled trial. *J Pediatr Adolesc Gynecol* 2008;**21**:247–257.
- Wheeler JM, Knittle JD, Miller JD. Depot leuprolide versus danazol in treatment of women with symptomatic endometriosis. I. Efficacy results. *Am J Obstet Gynecol* 1992;**167**:1367–1371.
- Wickstrom K, Bruse C, Sjosten A, Spira J, Edelman G. Perturbation with lignocaine as a new treatment of dysmenorrhea due to endometriosis: a randomized controlled trial. *Hum Reprod* 2012;**27**:695–701.
- Wong AY, Tang L. An open and randomized study comparing the efficacy of standard danazol and modified triptorelin regimens for postoperative disease management of moderate to severe endometriosis. *Fertil Steril* 2004;**81**:1522–1527.
- Wright J, Lotfallah H, Jones K, Lovell D. A randomized trial of excision versus ablation for mild endometriosis. *Fertil Steril* 2005;**83**:1830–1836.
- Wurm BF, Wurm LJ, Patterson K, Richard King C, Scharf ES. Decreasing dyspareunia and dysmenorrhea in women with endometriosis via a manual physical therapy: Results from two independent studies. *J Endometr* 2011;**3**:188–196.
- Wykes CB, Clark TJ, Chakravati S, Mann CH, Gupta JK. Efficacy of laparoscopic excision of visually diagnosed peritoneal endometriosis in the treatment of chronic pelvic pain. *Eur J Obstet Gynecol Reprod Biol* 2006;**125**:129–133.
- Xiang DF, Sun QZ, Liang XF. Effect of abdominal acupuncture on pain of pelvic cavity in patients with endometriosis. *Zhongguo Zhen Jiu* 2011;**31**:113–116.
- Xu XW, Wang LD, Zhu XQ, Yan LZ, Guan YT, Zhu SC, Hu Y. Levonorgestrel-releasing intrauterine system and combined oral contraceptives as conservative treatments for recurrent ovarian endometriosis: a comparative clinical study. *Zhonghua Yi Xue Za Zhi* 2011;**91**:1047–1050.
- Yeung P Jr, Sinervo K, Winer W, Albee RB Jr. Complete laparoscopic excision of endometriosis in teenagers: is postoperative hormonal suppression necessary? *Fertil Steril* 2011;**95**:1909–1912, 1912 e1901.
- Ylanen K, Laatikainen T, Lahteenmaki P, Moo-Young AJ. Subdermal progestin implant (Nestorone) in the treatment of endometriosis: clinical response to various doses. *Acta Obstet Gynecol Scand* 2003;**82**:167–172.
- Zullo F, Palomba S, Zupi E, Russo T, Morelli M, Capiello F, Mastrantonio P. Effectiveness of presacral neurectomy in women with severe dysmenorrhea caused by endometriosis who were treated with laparoscopic conservative surgery: a 1-year prospective randomized double-blind controlled trial. *Am J Obstet Gynecol* 2003;**189**:5–10.
- Zullo F, Palomba S, Zupi E, Russo T, Morelli M, Sena T, Pellicano M, Mastrantonio P. Long-term effectiveness of presacral neurectomy for the treatment of severe dysmenorrhea due to endometriosis. *J Am Assoc Gynecol Laparosc* 2004;**11**:23–28.
- Zupi E, Marconi D, Sbracia M, Zullo F, De Vivo B, Exacustos C, Sorrenti G. Add-back therapy in the treatment of endometriosis-associated pain. *Fertil Steril* 2004;**82**:1303–1308.
